# Supplementary material for: Using species ranges and macroeconomic data to fill the gap in costs of biological invasions
Source: Springer Nature journal article supplement (doi:10.1038/s41559-025-02697-5), 2025-05-26
Supplement: MOESM1 [file 41559_2025_2697_MOESM1_ESM.pdf]

# Using species ranges and macroeconomic data to fill the gap in costs of biological invasions

---

In the format provided by the authors and unedited

---

# Table-of-Contents

**Figure S1:** Global distribution of costs associated with invasive species in US\$ billions at the continental level.

**Figure S2:** Economic cost of invasive species per km<sup>2</sup> at the continental scale.

## Supplementary Material 1

Data extraction methodology

## Supplementary Material 2

Model validation of species distribution models.

## Supplementary Material 3

Importance of spatio-temporal predictors.

## Supplementary Tables

**Table S1:** Total economic cost (reported and interpolated) of invasive species worldwide.

**Table S2:** Summary of significant coefficients of the “best” models (ratio-scalar and mixed models) for damage costs and management expenditures.

**Table S3:** Top-5 ranking of models for damage costs and management expenditure based on Akaike Information Criterion (AIC).

**Table S4:** Geographic distribution of economic costs by invasive species at the continent level.

**Table S5:** Economic costs of invasive species at the country level.

**Table S6:** Overview of species records, taxonomic groups, and DOIs linked to data sources.

**Table S7:** Description of predictors, sources, and rationale used for species distribution models.

**Table S8:** Performance of species distribution models (GAMs and MaxEnt) based on AUC, TSS, and Boyce Index.

## Supplementary Material

**Supplementary Figures:**

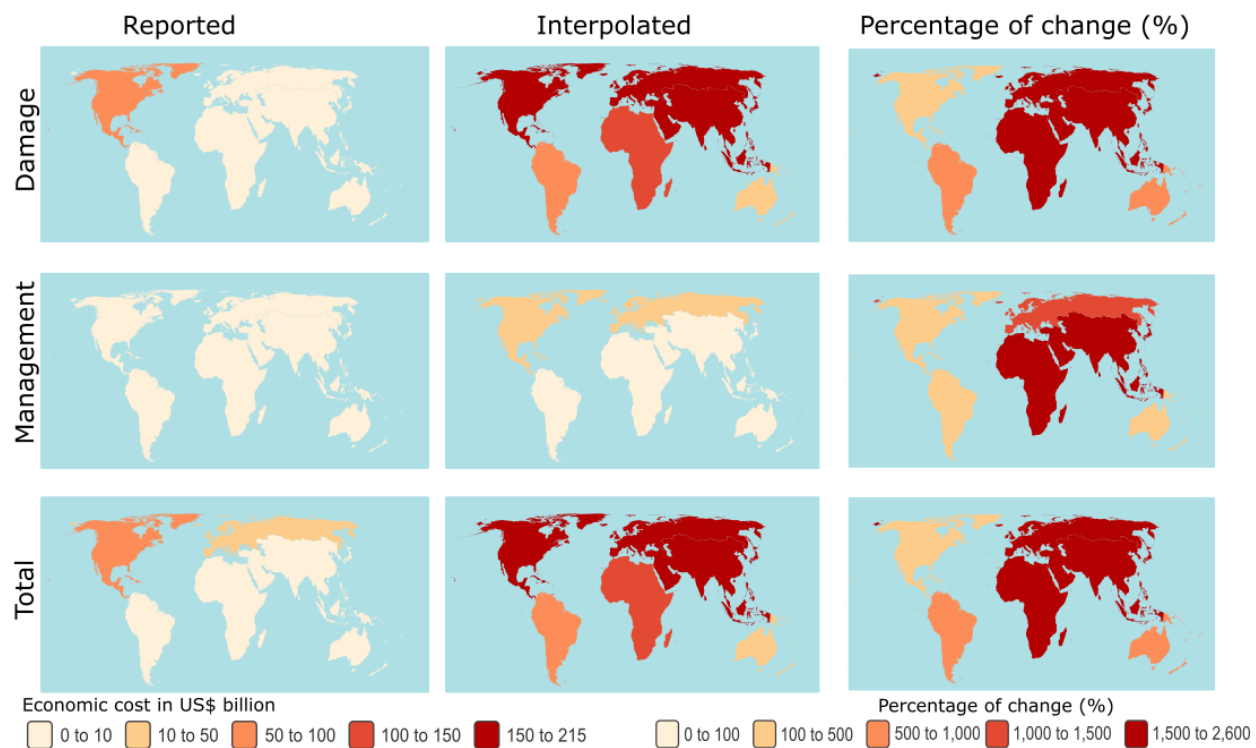

**Figure S1: Global distribution of costs associated with invasive species in US\$ billions at continental level** quantified in *InvaCost* split into a) damage costs and d) management expenditures and g) total costs (i.e., damage + management); b) the monetary cost taking into account the interpolated costs, split into b) damage costs, and e) management expenditures and h) the total costs (i.e., damage + management); and the percentage discrepancy between reported and interpolated costs, split into c) damage costs, f) management expenditures and i) total costs (i.e., damage + management).

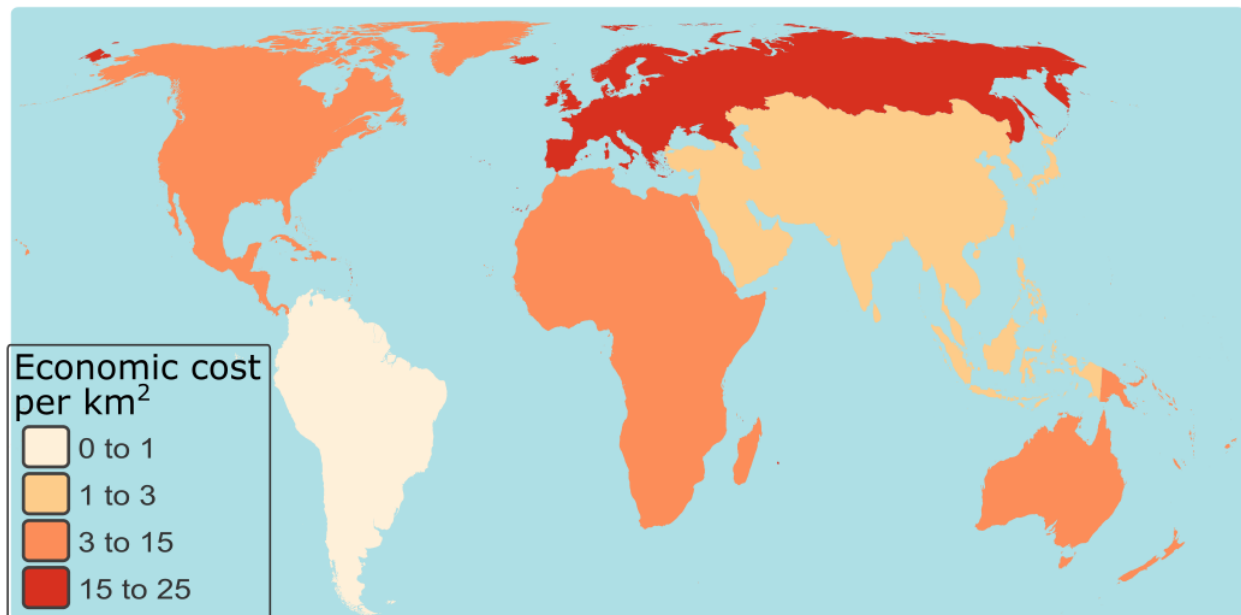

**Figure S2: Economic cost of invasive species per km<sup>2</sup> at continental scale.**



## Supplementary Material 1

To extract only 'highly reliable' (e.g., peer-reviewed articles with replicable methodologies) and 'observed' (i.e., costs already incurred, not just predicted) cost estimates from the *InvaCost* database, we excluded cost estimates with low reliability based on the 'Method reliability' and 'Implementation' columns, respectively. We also selected only the cost entries applying to country-level to ensure the comparability among cost scales (from the 'Spatial\_scale' column). We removed marine species and microorganisms (e.g., viruses) due to poor representation in the database. We also excluded the oak processionary moth (*Thaumetopoea processionea*) because its cost entry was classified as geographically "Diverse/Unspecified", thus making it impossible to attribute to any country.

## Supplementary Material 2

### *Model validation of the species distribution models*

To evaluate the performance of the models, we applied 5-fold cross-validation in the *trainControl* and *createFolds* functions of the `caret` R package<sup>1</sup>. Cross-validation is a powerful statistical method to assess the performance of species distribution models by providing a robust estimate of the model's prediction error<sup>2,3</sup>. This process involves dividing the dataset into ' $k$ ' subsets, or 'folds'; in our case, we split the original dataset into 5 equal-sized folds<sup>4</sup>. We trained and tested the model five times, where one of the five subsets becomes a validation test set, and the remaining four sets are combined to form the training set. This process is repeated five times, with each of the five subsets serving as the test set exactly once<sup>5</sup>. This leads to a better estimate of the model's performance and its ability to generalize to unknown data<sup>3</sup>. In

addition, to characterize the trade-off between true positive and false positive rates (i.e., model performance) we used the area under the receiver operating characteristic curve (AUC) and the true skill statistic (TSS) and Boyce index. While AUC has been criticized for equally weighing omission and commission errors and for focusing on discrimination over calibration, it remains valuable in our study for its prevalence-independence and its utility in dealing with pseudo-absences. Given these specific advantages<sup>6,7</sup>, AUC offers a robust measure for relative model performance in our analysis. An AUC = 1 indicates a perfect model that has no false positives or false negatives, while an AUC = 0.5 indicates that the model's ability to discriminate between positive and negative classes is no better than random<sup>8</sup>. Similarly, TSS provides a measure that considers both sensitivity and specificity, ranging from -1 to +1, where +1 indicates perfect fit and  $\leq 0$  indicates no better than random<sup>8</sup>. Lastly, the Boyce index compares predicted species distributions with actual presence data, quantifying how well the model predictions match with known species locations ranging from -1 to +1, where a score of 1 indicates perfect model performance and negative values suggest performance worse than random.

**Table S1:** Total economic cost reported and interpolated (in \$US million) of invasive species worldwide. Type of cost refers to the type of economic impact (damage costs or management expenditures). Type refers to the origin of the cost data (reported costs in *InvaCost* or interpolated based on our model average combining ratio-scalar and mixed model weighted by R-square. Range of Estimation [min-max costs] indicates the estimated range of economic costs, showing minimum and maximum values and range of estimation [80% costs] representing the central 80% of estimated values.

| <b>Species</b>  | <b>Type of cost</b> | <b>Type</b>  | <b>Economic cost</b> | <b>Range of estimation [min-max costs]</b> | <b>Range of estimation [80% costs]</b> |
|-----------------|---------------------|--------------|----------------------|--------------------------------------------|----------------------------------------|
| Acacia mearnsii | Damage              | Interpolated | 27160.95052          | 7675.20018-7675200.19244                   | 7675200.19244-7675200.19244            |
| Acacia mearnsii | Damage              | Invacost     | 2144.310778          |                                            |                                        |
| Adelges piceae  | Damage              | Interpolated | 6026.277176          | 970.8801-970880.10234                      | 970880.10234-970880.10234              |
| Adelges piceae  | Damage              | Invacost     | 1092.204356          |                                            |                                        |
| Adelges tsugae  | Management          | Interpolated | 18.78227147          | 0.21347-213.47371                          | 213.47371-213.47371                    |
| Adelges tsugae  | Management          | Invacost     | 4.9129727            |                                            |                                        |
| Aedes aegypti   | Damage              | Interpolated | 3234.89177           | 455.58169-455581.69419                     | 455581.69419-455581.69419              |
| Aedes aegypti   | Damage              | Invacost     | 3989.394189          |                                            |                                        |
| Aedes aegypti   | Management          | Interpolated | 2204.138311          | 375.41248-375412.47085                     | 375412.47085-375412.47085              |

|                             |            |              |             |                    |                       |
|-----------------------------|------------|--------------|-------------|--------------------|-----------------------|
| <i>Aedes aegypti</i>        | Management | Invacost     | 2119.121    |                    |                       |
| <i>Aedes albopictus</i>     | Management | Interpolated | 94.05924411 | 3.69911-3699.14414 | 3699.14414-3699.14414 |
| <i>Aedes albopictus</i>     | Management | Invacost     | 3.52961082  |                    |                       |
| <i>Aedes camptorhynchus</i> | Management | Invacost     | 3.63687859  |                    |                       |
| <i>Ageratina adenophora</i> | Management | Interpolated | 179.1199633 | 3.88608-3886.06144 | 3886.06144-3886.06144 |
| <i>Ageratina adenophora</i> | Management | Invacost     | 0.00334889  |                    |                       |
| <i>Agrilus planipennis</i>  | Management | Interpolated | 57.20731528 | 1.55477-1554.77258 | 1554.77258-1554.77258 |
| <i>Agrilus planipennis</i>  | Management | Invacost     | 332.1271298 |                    |                       |
| <i>Ailanthus altissima</i>  | Management | Interpolated | 317.9301036 | 6.05553-6055.55786 | 6055.55786-6055.55786 |
| <i>Ailanthus altissima</i>  | Management | Invacost     | 0.00415525  |                    |                       |

|                             |            |              |             |                          |                             |
|-----------------------------|------------|--------------|-------------|--------------------------|-----------------------------|
| Alopochen aegyptiaca        | Damage     | Interpolated | 5559.723356 | 0.91019-910.17871        | 910.17871-910.17871         |
| Alopochen aegyptiaca        | Damage     | Invacost     | 0.07968154  |                          |                             |
| Alternanthera philoxeroides | Management | Interpolated | 89.24099185 | 6.06678-6066.8054        | 6066.8054-6066.8054         |
| Alternanthera philoxeroides | Management | Invacost     | 7.51040374  |                          |                             |
| Ambrosia artemisiifolia     | Damage     | Interpolated | 9294.206307 | 2140.93106-2140931.03743 | 2140931.03743-2140931.03743 |
| Ambrosia artemisiifolia     | Damage     | Invacost     | 6810.264007 |                          |                             |
| Ambrosia artemisiifolia     | Management | Interpolated | 283.8159388 | 6.4195-6419.52309        | 6419.52309-6419.52309       |
| Ambrosia artemisiifolia     | Management | Invacost     | 0.04192474  |                          |                             |
| Anolis carolinensis         | Management | Interpolated | 38.15878735 | 3.45349-3453.48975       | 3453.48975-3453.48975       |
| Anolis carolinensis         | Management | Invacost     | 0.03566239  |                          |                             |

|                          |            |              |             |                          |                             |
|--------------------------|------------|--------------|-------------|--------------------------|-----------------------------|
| Anoplophora chinensis    | Management | Interpolated | 36.50963265 | 5.34633-5346.32688       | 5346.32688-5346.32688       |
| Anoplophora chinensis    | Management | Invacost     | 1.65480695  |                          |                             |
| Anoplophora glabripennis | Damage     | Interpolated | 9422.05677  | 1546.06699-1546066.99381 | 1546066.99381-1546066.99381 |
| Anoplophora glabripennis | Damage     | Invacost     | 317.5880455 |                          |                             |
| Anoplophora glabripennis | Management | Interpolated | 224.3501779 | 22.34525-22345.2436      | 22345.2436-22345.2436       |
| Anoplophora glabripennis | Management | Invacost     | 163.007014  |                          |                             |
| Apis mellifera           | Damage     | Interpolated | 3867.443472 | 110.75555-110755.53544   | 110755.53544-110755.53544   |
| Apis mellifera           | Damage     | Invacost     | 48.89902843 |                          |                             |
| Arctotheca calendula     | Management | Interpolated | 114.3726656 | 0.01316-13.16465         | 13.16465-13.16465           |
| Arctotheca calendula     | Management | Invacost     | 0.00217411  |                          |                             |

|                     |            |              |             |                        |                           |
|---------------------|------------|--------------|-------------|------------------------|---------------------------|
| Arion lusitanicus   | Damage     | Interpolated | 4781.465018 | 635.33163-635331.61727 | 635331.61727-635331.61727 |
| Arion lusitanicus   | Damage     | Invacost     | 43.2909782  |                        |                           |
| Artemisia vulgaris  | Damage     | Interpolated | 3646.150199 | 202.13994-202139.95854 | 202139.95854-202139.95854 |
| Artemisia vulgaris  | Damage     | Invacost     | 11.04147158 |                        |                           |
| Azolla filiculoides | Management | Interpolated | 165.6795133 | 8.5279-8527.88761      | 8527.88761-8527.88761     |
| Azolla filiculoides | Management | Invacost     | 6.23093149  |                        |                           |
| Bactrocera tryoni   | Damage     | Interpolated | 294.521439  | 40.92513-40925.13072   | 40925.13072-40925.13072   |
| Bactrocera tryoni   | Damage     | Invacost     | 116.541947  |                        |                           |
| Bactrocera tryoni   | Management | Interpolated | 15.84731907 | 9.56134-9561.34228     | 9561.34228-9561.34228     |
| Bactrocera tryoni   | Management | Invacost     | 8.39784788  |                        |                           |
| Bemisia tabaci      | Management | Interpolated | 268.6437364 | 6.79513-6795.14539     | 6795.14539-6795.14539     |

|                     |            |              |             |                        |                           |
|---------------------|------------|--------------|-------------|------------------------|---------------------------|
| Bemisia tabaci      | Management | Invacost     | 0.07495769  |                        |                           |
| Boiga irregularis   | Management | Interpolated | 7.40666669  | 0.08745-87.44628       | 87.44628-87.44628         |
| Boiga irregularis   | Management | Invacost     | 1.3627228   |                        |                           |
| Branta canadensis   | Damage     | Interpolated | 6954.474618 | 114.61422-114614.22751 | 114614.22751-114614.22751 |
| Branta canadensis   | Damage     | Invacost     | 2.2998964   |                        |                           |
| Branta canadensis   | Management | Interpolated | 208.0672939 | 22.95272-22952.73234   | 22952.73234-22952.73234   |
| Branta canadensis   | Management | Invacost     | 3.67121006  |                        |                           |
| Buddleja davidii    | Management | Interpolated | 265.8334865 | 7.17745-7177.45495     | 7177.45495-7177.45495     |
| Buddleja davidii    | Management | Invacost     | 0.60567407  |                        |                           |
| Cabomba caroliniana | Management | Interpolated | 136.0704635 | 7.96416-7964.14626     | 7964.14626-7964.14626     |
| Cabomba caroliniana | Management | Invacost     | 0.56180812  |                        |                           |

|                        |            |              |             |                        |                           |
|------------------------|------------|--------------|-------------|------------------------|---------------------------|
| Cactoblastis cactorum  | Damage     | Interpolated | 2632.23631  | 191.32114-191321.15022 | 191321.15022-191321.15022 |
| Cactoblastis cactorum  | Damage     | Invacost     | 26.12278336 |                        |                           |
| Cactoblastis cactorum  | Management | Interpolated | 112.4507572 | 7.79079-7790.79754     | 7790.79754-7790.79754     |
| Cactoblastis cactorum  | Management | Invacost     | 0.90362903  |                        |                           |
| Callosiurus erythraeus | Damage     | Interpolated | 1156.77555  | 4.78378-4783.77119     | 4783.77119-4783.77119     |
| Callosiurus erythraeus | Damage     | Invacost     | 0.99136305  |                        |                           |
| Camelus dromedarius    | Damage     | Interpolated | 240.4538141 | 4.53958-4539.58963     | 4539.58963-4539.58963     |
| Camelus dromedarius    | Damage     | Invacost     | 10.79121952 |                        |                           |
| Camelus dromedarius    | Management | Interpolated | 8.832999357 | 1.36559-1365.59123     | 1365.59123-1365.59123     |
| Camelus dromedarius    | Management | Invacost     | 8.60796312  |                        |                           |

|                     |            |              |             |                          |                             |
|---------------------|------------|--------------|-------------|--------------------------|-----------------------------|
| Cameraria ohridella | Management | Interpolated | 349.4403684 | 78.56919-78569.18634     | 78569.18634-78569.18634     |
| Cameraria ohridella | Management | Invacost     | 28.8741573  |                          |                             |
| Canis lupus         | Damage     | Interpolated | 4640.905131 | 894.8557-894855.69373    | 894855.69373-894855.69373   |
| Canis lupus         | Damage     | Invacost     | 1408.517388 |                          |                             |
| Canis lupus         | Management | Interpolated | 71.33468854 | 9.36279-9362.78968       | 9362.78968-9362.78968       |
| Canis lupus         | Management | Invacost     | 1691.069771 |                          |                             |
| Capra hircus        | Damage     | Interpolated | 9974.243691 | 1240.48511-1240485.09524 | 1240485.09524-1240485.09524 |
| Capra hircus        | Damage     | Invacost     | 56.41130413 |                          |                             |
| Capra hircus        | Management | Interpolated | 371.2362756 | 63.88817-63888.17589     | 63888.17589-63888.17589     |
| Capra hircus        | Management | Invacost     | 8.57574174  |                          |                             |
| Carduus platypus    | Damage     | Interpolated | 467.4226702 | 4.16677-4166.768         | 4166.768-4166.768           |

|                       |            |              |             |                            |                               |
|-----------------------|------------|--------------|-------------|----------------------------|-------------------------------|
| Carduus platypus      | Damage     | Invacost     | 11.02289116 |                            |                               |
| Carduus platypus      | Management | Interpolated | 9.932261402 | 0.04353-43.53331           | 43.53331-43.53331             |
| Carduus platypus      | Management | Invacost     | 0.05431669  |                            |                               |
| Castor canadensis     | Damage     | Interpolated | 2523.791583 | 49.21461-49214.61336       | 49214.61336-49214.61336       |
| Castor canadensis     | Damage     | Invacost     | 0.21135007  |                            |                               |
| Cenchrus clandestinus | Damage     | Interpolated | 34245.304   | 12362.44038-12362440.36504 | 12362440.36504-12362440.36504 |
| Cenchrus elandestinus | Damage     | Invacost     | 1192.906325 |                            |                               |
| Cenchrus setaceus     | Management | Interpolated | 134.2234551 | 10.36657-10366.5757        | 10366.5757-10366.5757         |
| Cenchrus setaceus     | Management | Invacost     | 0.8986961   |                            |                               |
| Ceratitis capitata    | Damage     | Interpolated | 9026.930083 | 1626.51484-1626514.87206   | 1626514.87206-1626514.87206   |
| Ceratitis capitata    | Damage     | Invacost     | 116.7957082 |                            |                               |

|                          |            |              |             |                          |                             |
|--------------------------|------------|--------------|-------------|--------------------------|-----------------------------|
| Ceratitis capitata       | Management | Interpolated | 558.1724912 | 130.20262-130202.62446   | 130202.62446-130202.62446   |
| Ceratitis capitata       | Management | Invacost     | 12.9773018  |                          |                             |
| Cereus jamacaru          | Management | Interpolated | 168.3472155 | 26.59336-26593.3469      | 26593.3469-26593.3469       |
| Cereus jamacaru          | Management | Invacost     | 37.76453863 |                          |                             |
| Ceutorhynchus obstrictus | Damage     | Interpolated | 13304.78562 | 2137.88511-2137885.12535 | 2137885.12535-2137885.12535 |
| Ceutorhynchus obstrictus | Damage     | Invacost     | 260.5058083 |                          |                             |
| Chelydra serpentina      | Management | Interpolated | 71.55809376 | 7.25029-7250.27765       | 7250.27765-7250.27765       |
| Chelydra serpentina      | Management | Invacost     | 0.01831801  |                          |                             |
| Chlorocebus pygerythrus  | Management | Interpolated | 104.2292318 | 0.09673-96.73571         | 96.73571-96.73571           |
| Chlorocebus pygerythrus  | Management | Invacost     | 0.04514824  |                          |                             |

|                     |            |              |             |                          |                             |
|---------------------|------------|--------------|-------------|--------------------------|-----------------------------|
| Chondrilla juncea   | Damage     | Interpolated | 2608.550536 | 927.68355-927683.55472   | 927683.55472-927683.55472   |
| Chondrilla juncea   | Damage     | Invacost     | 423.8185047 |                          |                             |
| Chondrilla juncea   | Management | Interpolated | 102.7539168 | 17.51591-17515.90457     | 17515.90457-17515.90457     |
| Chondrilla juncea   | Management | Invacost     | 12.17310578 |                          |                             |
| Chromolaena odorata | Management | Interpolated | 911.9301095 | 176.36436-176364.3441    | 176364.3441-176364.3441     |
| Chromolaena odorata | Management | Invacost     | 57.68553942 |                          |                             |
| Cirsium arvense     | Damage     | Interpolated | 7127.662691 | 1794.88896-1794888.95655 | 1794888.95655-1794888.95655 |
| Cirsium arvense     | Damage     | Invacost     | 487.0024921 |                          |                             |
| Clematis vitalba    | Management | Interpolated | 101.2899724 | 2.05223-2052.24234       | 2052.24234-2052.24234       |
| Clematis vitalba    | Management | Invacost     | 0.2886768   |                          |                             |
| Columba livia       | Damage     | Interpolated | 21212.62991 | 4468.5045-4468504.48472  | 4468504.48472-4468504.48472 |

|                        |            |              |             |                        |                           |
|------------------------|------------|--------------|-------------|------------------------|---------------------------|
| Columba livia          | Damage     | Invacost     | 373.77045   |                        |                           |
| Columba livia          | Management | Invacost     | 2946.465304 |                        |                           |
| Coptotermes formosanus | Damage     | Interpolated | 2850.983635 | 907.23139-907231.38583 | 907231.38583-907231.38583 |
| Coptotermes formosanus | Damage     | Invacost     | 2678.604822 |                        |                           |
| Corbicula fluminea     | Damage     | Interpolated | 6503.955987 | 9.04215-9042.12119     | 9042.12119-9042.12119     |
| Corbicula fluminea     | Damage     | Invacost     | 0.29776223  |                        |                           |
| Coreopsis lanceolata   | Management | Interpolated | 133.8704951 | 3.92824-3928.22621     | 3928.22621-3928.22621     |
| Coreopsis lanceolata   | Management | Invacost     | 0.00854488  |                        |                           |
| Cortaderia selloana    | Management | Interpolated | 174.6300618 | 9.24918-9249.17138     | 9249.17138-9249.17138     |
| Cortaderia selloana    | Management | Invacost     | 0.00124691  |                        |                           |
| Crassula helmsii       | Management | Interpolated | 148.9563792 | 26.99915-26999.144     | 26999.144-26999.144       |

|                          |            |              |             |                        |                           |
|--------------------------|------------|--------------|-------------|------------------------|---------------------------|
| Crassula helmsii         | Management | Invacost     | 5.44656883  |                        |                           |
| Cryptostegia grandiflora | Damage     | Interpolated | 6883.471081 | 506.58921-506589.21792 | 506589.21792-506589.21792 |
| Cryptostegia grandiflora | Damage     | Invacost     | 24.31863125 |                        |                           |
| Cryptostegia grandiflora | Management | Interpolated | 208.2878901 | 14.34989-14349.8715    | 14349.8715-14349.8715     |
| Cryptostegia grandiflora | Management | Invacost     | 1.48942835  |                        |                           |
| Cryptotermes brevis      | Management | Interpolated | 721.9543945 | 108.51451-108514.54052 | 108514.54052-108514.54052 |
| Cryptotermes brevis      | Management | Invacost     | 124.2494996 |                        |                           |
| Cydia pomonella          | Damage     | Interpolated | 1640.192871 | 112.7901-112790.0938   | 112790.0938-112790.0938   |
| Cydia pomonella          | Damage     | Invacost     | 396.4908265 |                        |                           |
| Cygnus olor              | Damage     | Interpolated | 5311.217086 | 0.30345-303.4571       | 303.4571-303.4571         |

|                      |            |              |             |                      |                         |
|----------------------|------------|--------------|-------------|----------------------|-------------------------|
| Cygnus olor          | Damage     | Invacost     | 0.04397352  |                      |                         |
| Cygnus olor          | Management | Interpolated | 159.0978835 | 2.54219-2542.19014   | 2542.19014-2542.19014   |
| Cygnus olor          | Management | Invacost     | 0.12113198  |                      |                         |
| Cytisus scoparius    | Management | Interpolated | 174.0723389 | 18.24027-18240.28225 | 18240.28225-18240.28225 |
| Cytisus scoparius    | Management | Invacost     | 2.57608852  |                      |                         |
| Dendroctonus micans  | Damage     | Interpolated | 310.8385885 | 0.12668-126.67826    | 126.67826-126.67826     |
| Dendroctonus micans  | Damage     | Invacost     | 0.42375676  |                      |                         |
| Dendroctonus micans  | Management | Interpolated | 7.11576779  | 0.03173-31.73369     | 31.73369-31.73369       |
| Dendroctonus micans  | Management | Invacost     | 0.10997238  |                      |                         |
| Dreissena polymorpha | Management | Interpolated | 242.7398752 | 38.15158-38151.5815  | 38151.5815-38151.5815   |
| Dreissena polymorpha | Management | Invacost     | 7.47274565  |                      |                         |

|                            |            |              |             |                          |                             |
|----------------------------|------------|--------------|-------------|--------------------------|-----------------------------|
| <i>Drosophila suzukii</i>  | Damage     | Interpolated | 3500.576482 | 97.55827-97558.27181     | 97558.27181-97558.27181     |
| <i>Drosophila suzukii</i>  | Damage     | Invacost     | 28.99703221 |                          |                             |
| <i>Echium plantagineum</i> | Management | Interpolated | 182.093665  | 12.09913-12099.14186     | 12099.14186-12099.14186     |
| <i>Echium plantagineum</i> | Management | Invacost     | 1.60972677  |                          |                             |
| <i>Elaeis guineensis</i>   | Damage     | Interpolated | 24314.26134 | 8519.74058-8519740.53546 | 8519740.53546-8519740.53546 |
| <i>Elaeis guineensis</i>   | Damage     | Invacost     | 1355.764213 |                          |                             |
| <i>Elatobium abietinum</i> | Damage     | Interpolated | 1157.682005 | 7.99498-7994.9868        | 7994.9868-7994.9868         |
| <i>Elatobium abietinum</i> | Damage     | Invacost     | 6.19972403  |                          |                             |
| <i>Elodea nuttallii</i>    | Management | Interpolated | 245.9415095 | 57.07506-57075.04697     | 57075.04697-57075.04697     |
| <i>Elodea nuttallii</i>    | Management | Invacost     | 14.72542991 |                          |                             |
| <i>Ephestia kuehniella</i> | Damage     | Interpolated | 3994.915487 | 11.74853-11748.53752     | 11748.53752-11748.53752     |

|                        |            |              |             |                        |                           |
|------------------------|------------|--------------|-------------|------------------------|---------------------------|
| Ephestia kuehniella    | Damage     | Invacost     | 1.1730136   |                        |                           |
| Ephestia kuehniella    | Management | Interpolated | 187.1997659 | 19.22649-19226.49301   | 19226.49301-19226.49301   |
| Ephestia kuehniella    | Management | Invacost     | 5.15937092  |                        |                           |
| Equus caballus         | Management | Interpolated | 150.3886215 | 13.54532-13545.30012   | 13545.30012-13545.30012   |
| Equus caballus         | Management | Invacost     | 0.47719449  |                        |                           |
| Euphorbia esula        | Damage     | Invacost     | 5689.680631 |                        |                           |
| Fallopia baldschuanica | Management | Interpolated | 149.5762173 | 10.55111-10551.106     | 10551.106-10551.106       |
| Fallopia baldschuanica | Management | Invacost     | 0.00087024  |                        |                           |
| Felis catus            | Damage     | Interpolated | 7113.268732 | 337.31704-337317.04327 | 337317.04327-337317.04327 |
| Felis catus            | Damage     | Invacost     | 41272.55106 |                        |                           |
| Felis catus            | Management | Interpolated | 169.3860383 | 4.42155-4421.56303     | 4421.56303-4421.56303     |

|                            |            |              |             |                          |                             |
|----------------------------|------------|--------------|-------------|--------------------------|-----------------------------|
| Felis catus                | Management | Invacost     | 0.72473378  |                          |                             |
| Frankliniella occidentalis | Damage     | Interpolated | 43525.18951 | 4199.47521-4199475.22986 | 4199475.22986-4199475.22986 |
| Frankliniella occidentalis | Damage     | Invacost     | 96.5026875  |                          |                             |
| Haematobia irritans        | Damage     | Interpolated | 14865.94908 | 1751.62925-1751629.2548  | 1751629.2548-1751629.2548   |
| Haematobia irritans        | Damage     | Invacost     | 2214.299363 |                          |                             |
| Hakea sericea              | Management | Interpolated | 39.58239768 | 0.79146-791.4506         | 791.4506-791.4506           |
| Hakea sericea              | Management | Invacost     | 0.00029075  |                          |                             |
| Heliotropium europaeum     | Management | Interpolated | 86.66975852 | 0.06341-63.42006         | 63.42006-63.42006           |
| Heliotropium europaeum     | Management | Invacost     | 0.01803827  |                          |                             |
| Hemitragus jemlahicus      | Management | Interpolated | 13.10755159 | 0.54589-545.88818        | 545.88818-545.88818         |

|                          |            |              |             |                      |                         |
|--------------------------|------------|--------------|-------------|----------------------|-------------------------|
| Hemitragus jemlahicus    | Management | Invacost     | 0.33723567  |                      |                         |
| Heracleum mantegazzianum | Damage     | Interpolated | 5296.848906 | 79.62267-79622.66315 | 79622.66315-79622.66315 |
| Heracleum mantegazzianum | Damage     | Invacost     | 1.35298262  |                      |                         |
| Heracleum mantegazzianum | Management | Interpolated | 226.3237163 | 25.08093-25080.94154 | 25080.94154-25080.94154 |
| Heracleum mantegazzianum | Management | Invacost     | 13.61720919 |                      |                         |
| Herpestes edwardsi       | Damage     | Interpolated | 370.8018625 | 3.78474-3784.74381   | 3784.74381-3784.74381   |
| Herpestes edwardsi       | Damage     | Invacost     | 62.75730845 |                      |                         |
| Herpestes javanicus      | Damage     | Interpolated | 5178.765284 | 4.04597-4045.98629   | 4045.98629-4045.98629   |
| Herpestes javanicus      | Damage     | Invacost     | 0.24444494  |                      |                         |
| Homarus americanus       | Management | Interpolated | 45.87802056 | 7.77042-7770.42467   | 7770.42467-7770.42467   |

|                           |            |              |             |                      |                         |
|---------------------------|------------|--------------|-------------|----------------------|-------------------------|
| Homarus americanus        | Management | Invacost     | 0.17350372  |                      |                         |
| Hyblaea puera             | Management | Interpolated | 49.01421839 | 0.01352-13.51947     | 13.51947-13.51947       |
| Hyblaea puera             | Management | Invacost     | 0.013001    |                      |                         |
| Hydrocotyle ranunculoides | Management | Interpolated | 271.1115895 | 64.76386-64763.86355 | 64763.86355-64763.86355 |
| Hydrocotyle ranunculoides | Management | Invacost     | 24.2467835  |                      |                         |
| Hypera postica            | Management | Interpolated | 119.8800477 | 43.6628-43662.7968   | 43662.7968-43662.7968   |
| Hypera postica            | Management | Invacost     | 118.2197012 |                      |                         |
| Impatiens glandulifera    | Management | Interpolated | 205.3589632 | 14.21539-14215.3691  | 14215.3691-14215.3691   |
| Impatiens glandulifera    | Management | Invacost     | 1.736947    |                      |                         |
| Lagarosiphon major        | Management | Interpolated | 160.279734  | 30.85036-30850.37249 | 30850.37249-30850.37249 |

|                              |            |              |             |                          |                             |
|------------------------------|------------|--------------|-------------|--------------------------|-----------------------------|
| Lagarosiphon major           | Management | Invacost     | 7.2990416   |                          |                             |
| Lantana camara               | Damage     | Interpolated | 20860.53642 | 5050.11258-5050112.53782 | 5050112.53782-5050112.53782 |
| Lantana camara               | Damage     | Invacost     | 187.0933399 |                          |                             |
| Lantana camara               | Management | Interpolated | 2473.175771 | 517.46276-517462.78304   | 517462.78304-517462.78304   |
| Lantana camara               | Management | Invacost     | 156.6398742 |                          |                             |
| Leptinotarsa<br>decemlineata | Damage     | Interpolated | 5629.719695 | 64.10571-64105.70485     | 64105.70485-64105.70485     |
| Leptinotarsa<br>decemlineata | Damage     | Invacost     | 1.300001    |                          |                             |
| Leptinotarsa<br>decemlineata | Management | Interpolated | 114.4063687 | 7.56733-7567.33563       | 7567.33563-7567.33563       |
| Leptinotarsa<br>decemlineata | Management | Invacost     | 5.37767246  |                          |                             |
| Linepithema humile           | Management | Interpolated | 176.6158844 | 7.6105-7610.52676        | 7610.52676-7610.52676       |

|                         |            |              |             |                        |                           |
|-------------------------|------------|--------------|-------------|------------------------|---------------------------|
| Linepithema humile      | Management | Invacost     | 0.68171824  |                        |                           |
| Lissachatina fulica     | Management | Interpolated | 219.9739567 | 9.99887-9998.85632     | 9998.85632-9998.85632     |
| Lissachatina fulica     | Management | Invacost     | 0.41406601  |                        |                           |
| Lithobates catesbeianus | Management | Interpolated | 147.8191917 | 7.10659-7106.60586     | 7106.60586-7106.60586     |
| Lithobates catesbeianus | Management | Invacost     | 0.05037243  |                        |                           |
| Lonicera japonica       | Management | Interpolated | 249.8096315 | 9.15141-9151.4565      | 9151.4565-9151.4565       |
| Lonicera japonica       | Management | Invacost     | 0.00002997  |                        |                           |
| Ludwigia grandiflora    | Management | Interpolated | 36.27463532 | 0.05541-55.40864       | 55.40864-55.40864         |
| Ludwigia grandiflora    | Management | Invacost     | 0.03742981  |                        |                           |
| Marrubium vulgare       | Damage     | Interpolated | 3920.269638 | 176.26967-176269.65562 | 176269.65562-176269.65562 |

|                    |            |              |             |                        |                           |
|--------------------|------------|--------------|-------------|------------------------|---------------------------|
| Marrubium vulgare  | Damage     | Invacost     | 1.9811152   |                        |                           |
| Marrubium vulgare  | Management | Interpolated | 119.0323397 | 0.0517-51.69035        | 51.69035-51.69035         |
| Marrubium vulgare  | Management | Invacost     | 0.01021004  |                        |                           |
| Melia azedarach    | Management | Interpolated | 2359.8687   | 551.92035-551920.35305 | 551920.35305-551920.35305 |
| Melia azedarach    | Management | Invacost     | 70.97475097 |                        |                           |
| Mimosa diplotricha | Damage     | Interpolated | 3524.151404 | 65.4005-65400.50189    | 65400.50189-65400.50189   |
| Mimosa diplotricha | Damage     | Invacost     | 5.34418409  |                        |                           |
| Mimosa diplotricha | Management | Interpolated | 124.6008001 | 0.46133-461.32686      | 461.32686-461.32686       |
| Mimosa diplotricha | Management | Invacost     | 0.01802562  |                        |                           |
| Mimosa pigra       | Management | Interpolated | 371.5957788 | 29.49018-29490.17986   | 29490.17986-29490.17986   |

|                   |            |              |             |                        |                           |
|-------------------|------------|--------------|-------------|------------------------|---------------------------|
| Mimosa pigra      | Management | Invacost     | 5.34501281  |                        |                           |
| Muntiacus reevesi | Damage     | Interpolated | 1133.224145 | 1.34663-1346.62424     | 1346.62424-1346.62424     |
| Muntiacus reevesi | Damage     | Invacost     | 0.29947445  |                        |                           |
| Mus musculus      | Damage     | Interpolated | 13023.10188 | 918.88773-918887.73333 | 918887.73333-918887.73333 |
| Mus musculus      | Damage     | Invacost     | 22.05588408 |                        |                           |
| Mustela erminea   | Management | Interpolated | 26.31334217 | 3.66784-3667.84201     | 3667.84201-3667.84201     |
| Mustela erminea   | Management | Invacost     | 1.54750004  |                        |                           |
| Mustela vison     | Damage     | Interpolated | 8060.780822 | 546.77727-546777.29302 | 546777.29302-546777.29302 |
| Mustela vison     | Damage     | Invacost     | 18.0382915  |                        |                           |
| Mustela vison     | Management | Interpolated | 217.9507056 | 24.75365-24753.66338   | 24753.66338-24753.66338   |

|                        |            |              |             |                      |                         |
|------------------------|------------|--------------|-------------|----------------------|-------------------------|
| Mustela vison          | Management | Invacost     | 16.04501176 |                      |                         |
| Myiopsitta monachus    | Management | Interpolated | 35.49343712 | 0.25996-259.95174    | 259.95174-259.95174     |
| Myiopsitta monachus    | Management | Invacost     | 0.64127481  |                      |                         |
| Myocastor coypus       | Damage     | Interpolated | 5215.293361 | 161.50948-161509.493 | 161509.493-161509.493   |
| Myocastor coypus       | Damage     | Invacost     | 21.97110912 |                      |                         |
| Myocastor coypus       | Management | Interpolated | 288.7405164 | 12.91559-12915.57456 | 12915.57456-12915.57456 |
| Myocastor coypus       | Management | Invacost     | 0.66465021  |                      |                         |
| Myriophyllum aquaticum | Management | Interpolated | 299.3795325 | 42.69117-42691.17029 | 42691.17029-42691.17029 |
| Myriophyllum aquaticum | Management | Invacost     | 7.22488388  |                      |                         |
| Nassella neesiana      | Management | Interpolated | 122.9730192 | 14.34161-14341.59617 | 14341.59617-14341.59617 |

|                          |            |              |             |                        |                           |
|--------------------------|------------|--------------|-------------|------------------------|---------------------------|
| Nassella neesiana        | Management | Invacost     | 1.79530611  |                        |                           |
| Nassella trichotoma      | Management | Interpolated | 103.4356177 | 10.77839-10778.39757   | 10778.39757-10778.39757   |
| Nassella trichotoma      | Management | Invacost     | 2.63048666  |                        |                           |
| Nyctereutes procyonoides | Management | Interpolated | 196.1687508 | 9.81785-9817.87469     | 9817.87469-9817.87469     |
| Nyctereutes procyonoides | Management | Invacost     | 1.77216551  |                        |                           |
| Nymphoides peltata       | Management | Interpolated | 353.0690193 | 39.82103-39821.029     | 39821.029-39821.029       |
| Nymphoides peltata       | Management | Invacost     | 8.32230345  |                        |                           |
| Ondatra zibethicus       | Damage     | Interpolated | 9768.724879 | 1688.88658-168886.5906 | 168886.5906-168886.5906   |
| Ondatra zibethicus       | Damage     | Invacost     | 183.2207071 |                        |                           |
| Ondatra zibethicus       | Management | Interpolated | 702.9124644 | 133.46743-133467.42058 | 133467.42058-133467.42058 |

|                          |            |              |             |                            |                               |
|--------------------------|------------|--------------|-------------|----------------------------|-------------------------------|
| Ondatra zibethicus       | Management | Invacost     | 83.5411048  |                            |                               |
| Opuntia aurantiaca       | Management | Interpolated | 69.61686113 | 0.75651-756.5209           | 756.5209-756.5209             |
| Opuntia aurantiaca       | Management | Invacost     | 0.4153015   |                            |                               |
| Oryctolagus cuniculus    | Damage     | Interpolated | 52573.98554 | 10774.53855-10774538.55952 | 10774538.55952-10774538.55952 |
| Oryctolagus cuniculus    | Damage     | Invacost     | 3258.137421 |                            |                               |
| Oryctolagus cuniculus    | Management | Interpolated | 590.0043499 | 94.38418-94384.17981       | 94384.17981-94384.17981       |
| Oryctolagus cuniculus    | Management | Invacost     | 34.92233515 |                            |                               |
| Oxyura jamaicensis       | Management | Interpolated | 134.3441809 | 18.96859-18968.60803       | 18968.60803-18968.60803       |
| Oxyura jamaicensis       | Management | Invacost     | 3.22416223  |                            |                               |
| Pacifastacus leniusculus | Damage     | Interpolated | 4102.879476 | 2.87791-2877.92594         | 2877.92594-2877.92594         |

|                             |            |              |             |                        |                           |
|-----------------------------|------------|--------------|-------------|------------------------|---------------------------|
| Pacifastacus leniusculus    | Damage     | Invacost     | 0.3473902   |                        |                           |
| Pacifastacus leniusculus    | Management | Interpolated | 76.10200961 | 5.59114-5591.15241     | 5591.15241-5591.15241     |
| Pacifastacus leniusculus    | Management | Invacost     | 4.29185999  |                        |                           |
| Paguma larvata              | Damage     | Invacost     | 56.65212233 |                        |                           |
| Panicum repens              | Management | Interpolated | 106.515387  | 3.30384-3303.8606      | 3303.8606-3303.8606       |
| Panicum repens              | Management | Invacost     | 0.00014587  |                        |                           |
| Parkinsonia aculeata        | Management | Interpolated | 318.220089  | 20.65899-20658.97375   | 20658.97375-20658.97375   |
| Parkinsonia aculeata        | Management | Invacost     | 1.89671574  |                        |                           |
| Parthenium<br>hysterophorus | Damage     | Interpolated | 4112.807171 | 513.25536-513255.39587 | 513255.39587-513255.39587 |
| Parthenium<br>hysterophorus | Damage     | Invacost     | 252.5477593 |                        |                           |

|                          |            |              |             |                        |                           |
|--------------------------|------------|--------------|-------------|------------------------|---------------------------|
| Parthenium hysterophorus | Management | Interpolated | 413.4695319 | 83.89047-83890.48184   | 83890.48184-83890.48184   |
| Parthenium hysterophorus | Management | Invacost     | 11.22484225 |                        |                           |
| Passer domesticus        | Damage     | Interpolated | 11448.19994 | 118.28301-118283.03992 | 118283.03992-118283.03992 |
| Passer domesticus        | Damage     | Invacost     | 0.20152626  |                        |                           |
| Petromyzon marinus       | Damage     | Interpolated | 1214.825623 | 251.21785-251217.8503  | 251217.8503-251217.8503   |
| Petromyzon marinus       | Damage     | Invacost     | 349.7927407 |                        |                           |
| Petromyzon marinus       | Management | Interpolated | 8.726506597 | 0.33653-336.53138      | 336.53138-336.53138       |
| Petromyzon marinus       | Management | Invacost     | 20.68371426 |                        |                           |
| Phascolarctos cinereus   | Management | Invacost     | 0.38198722  |                        |                           |
| Phasianus colchicus      | Damage     | Interpolated | 11079.65633 | 248.54327-248543.2691  | 248543.2691-248543.2691   |

|                        |            |              |             |                        |                           |
|------------------------|------------|--------------|-------------|------------------------|---------------------------|
| Phasianus colchicus    | Damage     | Invacost     | 4.67680946  |                        |                           |
| Phelipanche aegyptiaca | Management | Interpolated | 80.27132612 | 7.32358-7323.57593     | 7323.57593-7323.57593     |
| Phelipanche aegyptiaca | Management | Invacost     | 2.76187918  |                        |                           |
| Phoxinus phoxinus      | Management | Interpolated | 29.23638231 | 1.44152-1441.50747     | 1441.50747-1441.50747     |
| Phoxinus phoxinus      | Management | Invacost     | 0.40336648  |                        |                           |
| Phragmites australis   | Management | Interpolated | 5.313028978 | 0.02503-25.0334        | 25.0334-25.0334           |
| Phragmites australis   | Management | Invacost     | 0.96803345  |                        |                           |
| Pistia stratiotes      | Management | Interpolated | 89.53834361 | 7.37547-7375.49093     | 7375.49093-7375.49093     |
| Pistia stratiotes      | Management | Invacost     | 0.03163041  |                        |                           |
| Pomacea canaliculata   | Damage     | Interpolated | 4763.00584  | 854.38372-854383.70072 | 854383.70072-854383.70072 |

|                      |            |              |             |                          |                             |
|----------------------|------------|--------------|-------------|--------------------------|-----------------------------|
| Pomacea canaliculata | Damage     | Invacost     | 138.570755  |                          |                             |
| Pontederia crassipes | Damage     | Interpolated | 20899.02311 | 2262.45933-2262459.31957 | 2262459.31957-2262459.31957 |
| Pontederia crassipes | Damage     | Invacost     | 1513.514052 |                          |                             |
| Pontederia crassipes | Management | Interpolated | 280.6310736 | 29.55006-29550.06606     | 29550.06606-29550.06606     |
| Pontederia crassipes | Management | Invacost     | 0.97841418  |                          |                             |
| Procambarus clarkii  | Damage     | Interpolated | 6793.94634  | 50.83231-50832.27114     | 50832.27114-50832.27114     |
| Procambarus clarkii  | Damage     | Invacost     | 1.21526847  |                          |                             |
| Procambarus clarkii  | Management | Interpolated | 196.8346717 | 19.36585-19365.83225     | 19365.83225-19365.83225     |
| Procambarus clarkii  | Management | Invacost     | 1.02791121  |                          |                             |
| Procyon lotor        | Damage     | Interpolated | 5812.820155 | 713.17617-713176.17504   | 713176.17504-713176.17504   |

|                     |            |              |             |                        |                           |
|---------------------|------------|--------------|-------------|------------------------|---------------------------|
| Procyon lotor       | Damage     | Invacost     | 45.47311667 |                        |                           |
| Procyon lotor       | Management | Interpolated | 136.4293291 | 11.28967-11289.67658   | 11289.67658-11289.67658   |
| Procyon lotor       | Management | Invacost     | 0.07371308  |                        |                           |
| Prunus serotina     | Damage     | Interpolated | 5770.304984 | 71.81189-71811.91035   | 71811.91035-71811.91035   |
| Prunus serotina     | Damage     | Invacost     | 1.8039765   |                        |                           |
| Prunus serotina     | Management | Interpolated | 190.3385496 | 25.77732-25777.3144    | 25777.3144-25777.3144     |
| Prunus serotina     | Management | Invacost     | 4.38108435  |                        |                           |
| Pseudorasbora parva | Management | Interpolated | 184.3352058 | 9.2604-9260.3836       | 9260.3836-9260.3836       |
| Pseudorasbora parva | Management | Invacost     | 0.45288295  |                        |                           |
| Psittacula krameri  | Damage     | Interpolated | 4918.1393   | 256.46646-256466.49336 | 256466.49336-256466.49336 |

|                     |            |              |             |                          |                             |
|---------------------|------------|--------------|-------------|--------------------------|-----------------------------|
| Psittacula krameri  | Damage     | Invacost     | 56.36414103 |                          |                             |
| Psittacula krameri  | Management | Interpolated | 299.6198678 | 10.87175-10871.74917     | 10871.74917-10871.74917     |
| Psittacula krameri  | Management | Invacost     | 0.14503599  |                          |                             |
| Pteridium aquilinum | Damage     | Interpolated | 7481.658264 | 3100.99361-3100993.61814 | 3100993.61814-3100993.61814 |
| Pteridium aquilinum | Damage     | Invacost     | 683.6240169 |                          |                             |
| Rattus exulans      | Management | Interpolated | 121.6738327 | 4.88035-4880.34931       | 4880.34931-4880.34931       |
| Rattus exulans      | Management | Invacost     | 0.14752365  |                          |                             |
| Rattus norvegicus   | Management | Interpolated | 922.4354711 | 171.80434-171804.33694   | 171804.33694-171804.33694   |
| Rattus norvegicus   | Management | Invacost     | 55.59453209 |                          |                             |
| Rattus rattus       | Damage     | Interpolated | 12077.13969 | 262.8801-262880.0842     | 262880.0842-262880.0842     |

|                           |            |              |             |                         |                             |
|---------------------------|------------|--------------|-------------|-------------------------|-----------------------------|
| Rattus rattus             | Damage     | Invacost     | 23850.61079 |                         |                             |
| Reynoutria japonica       | Damage     | Interpolated | 6986.554013 | 98.77105-98771.06831    | 98771.06831-98771.06831     |
| Reynoutria japonica       | Damage     | Invacost     | 1.93843273  |                         |                             |
| Reynoutria japonica       | Management | Interpolated | 4947.486673 | 1150.3801-1150380.11212 | 1150380.11212-1150380.11212 |
| Reynoutria japonica       | Management | Invacost     | 517.6445253 |                         |                             |
| Rhinella marina           | Management | Interpolated | 104.7466531 | 16.84554-16845.54608    | 16845.54608-16845.54608     |
| Rhinella marina           | Management | Invacost     | 1.5517708   |                         |                             |
| Rhododendron ponticum     | Management | Interpolated | 128.7027296 | 40.09512-40095.11676    | 40095.11676-40095.11676     |
| Rhododendron ponticum     | Management | Invacost     | 14.97500101 |                         |                             |
| Rhynchophorus ferrugineus | Management | Interpolated | 129.7524884 | 6.91477-6914.78476      | 6914.78476-6914.78476       |

|                           |            |              |             |                      |                         |
|---------------------------|------------|--------------|-------------|----------------------|-------------------------|
| Rhynchophorus ferrugineus | Management | Invacost     | 0.53434923  |                      |                         |
| Rosa rugosa               | Management | Interpolated | 253.3177602 | 26.57246-26572.45623 | 26572.45623-26572.45623 |
| Rosa rugosa               | Management | Invacost     | 1.40793627  |                      |                         |
| Rumex lunaria             | Management | Interpolated | 8.148245214 | 0.01197-11.97364     | 11.97364-11.97364       |
| Rumex lunaria             | Management | Invacost     | 0.01246014  |                      |                         |
| Salvinia molesta          | Damage     | Interpolated | 8550.218693 | 1.77937-1779.32618   | 1779.32618-1779.32618   |
| Salvinia molesta          | Damage     | Invacost     | 0.04439956  |                      |                         |
| Salvinia molesta          | Management | Interpolated | 197.6116728 | 6.48606-6486.04055   | 6486.04055-6486.04055   |
| Salvinia molesta          | Management | Invacost     | 0.32741379  |                      |                         |
| Sciurus carolinensis      | Damage     | Interpolated | 1759.027085 | 83.90653-83906.53939 | 83906.53939-83906.53939 |

|                          |            |              |             |                      |                         |
|--------------------------|------------|--------------|-------------|----------------------|-------------------------|
| Sciurus carolinensis     | Damage     | Invacost     | 27.36628518 |                      |                         |
| Sciurus carolinensis     | Management | Interpolated | 86.22915824 | 24.01215-24012.15313 | 24012.15313-24012.15313 |
| Sciurus carolinensis     | Management | Invacost     | 12.79019286 |                      |                         |
| Senecio inaequidens      | Management | Interpolated | 137.8891091 | 12.63206-12632.05228 | 12632.05228-12632.05228 |
| Senecio inaequidens      | Management | Invacost     | 0.00284052  |                      |                         |
| Senecio jacobaea         | Management | Interpolated | 50.73414872 | 0.01085-10.84661     | 10.84661-10.84661       |
| Senecio jacobaea         | Management | Invacost     | 0.00932643  |                      |                         |
| Senecio madagascariensis | Management | Interpolated | 84.23384129 | 0.04325-43.2469      | 43.2469-43.2469         |
| Senecio madagascariensis | Management | Invacost     | 0.01519491  |                      |                         |
| Senna obtusifolia        | Management | Interpolated | 294.5667881 | 2.10479-2104.83335   | 2104.83335-2104.83335   |

|                       |            |              |             |                        |                           |
|-----------------------|------------|--------------|-------------|------------------------|---------------------------|
| Senna obtusifolia     | Management | Invacost     | 0.00844633  |                        |                           |
| Sirex noctilio        | Management | Interpolated | 104.7015485 | 1.58183-1581.81845     | 1581.81845-1581.81845     |
| Sirex noctilio        | Management | Invacost     | 0.70179308  |                        |                           |
| Solanum mauritianum   | Management | Interpolated | 237.6784364 | 15.51547-15515.50265   | 15515.50265-15515.50265   |
| Solanum mauritianum   | Management | Invacost     | 1.47056391  |                        |                           |
| Solenopsis invicta    | Management | Interpolated | 123.5962615 | 22.30591-22305.89824   | 22305.89824-22305.89824   |
| Solenopsis invicta    | Management | Invacost     | 21.22197258 |                        |                           |
| Spodoptera frugiperda | Damage     | Interpolated | 1891.3172   | 860.14835-860148.34674 | 860148.34674-860148.34674 |
| Spodoptera frugiperda | Damage     | Invacost     | 2909.141801 |                        |                           |
| Spodoptera frugiperda | Management | Interpolated | 52.07721007 | 8.50844-8508.43377     | 8508.43377-8508.43377     |

|                        |            |              |             |                          |                             |
|------------------------|------------|--------------|-------------|--------------------------|-----------------------------|
| Spodoptera frugiperda  | Management | Invacost     | 4.000001    |                          |                             |
| Sporobolus pyramidalis | Management | Interpolated | 4.732438314 | 0.06788-67.886           | 67.886-67.886               |
| Sporobolus pyramidalis | Management | Invacost     | 0.45781182  |                          |                             |
| Stomoxys calcitrans    | Damage     | Interpolated | 8782.037223 | 1008.79861-1008798.60657 | 1008798.60657-1008798.60657 |
| Stomoxys calcitrans    | Damage     | Invacost     | 3188.591082 |                          |                             |
| Sturnus vulgaris       | Damage     | Interpolated | 7273.930171 | 1288.65185-1288651.85615 | 1288651.85615-1288651.85615 |
| Sturnus vulgaris       | Damage     | Invacost     | 2278.716082 |                          |                             |
| Sus scrofa             | Damage     | Interpolated | 30020.11669 | 7344.80555-7344805.52121 | 7344805.52121-7344805.52121 |
| Sus scrofa             | Damage     | Invacost     | 4811.390122 |                          |                             |
| Sus scrofa             | Management | Interpolated | 251.0769811 | 23.61599-23615.9869      | 23615.9869-23615.9869       |

|                       |            |              |             |                        |                           |
|-----------------------|------------|--------------|-------------|------------------------|---------------------------|
| Sus scrofa            | Management | Invacost     | 6.22807099  |                        |                           |
| Tamarix aphylla       | Management | Interpolated | 80.62300563 | 1.60163-1601.61687     | 1601.61687-1601.61687     |
| Tamarix aphylla       | Management | Invacost     | 0.75229404  |                        |                           |
| Tinca tinca           | Management | Interpolated | 136.9697642 | 1.58813-1588.12591     | 1588.12591-1588.12591     |
| Tinca tinca           | Management | Invacost     | 0.12537061  |                        |                           |
| Trachemys scripta     | Management | Interpolated | 218.0315552 | 19.86804-19868.0599    | 19868.0599-19868.0599     |
| Trachemys scripta     | Management | Invacost     | 0.83042581  |                        |                           |
| Trichosurus vulpecula | Management | Interpolated | 192.2848197 | 85.79208-85792.07951   | 85792.07951-85792.07951   |
| Trichosurus vulpecula | Management | Invacost     | 151.6404417 |                        |                           |
| Tuta absoluta         | Damage     | Interpolated | 2064.246318 | 491.25342-491253.41949 | 491253.41949-491253.41949 |

|                   |            |              |             |                        |                           |
|-------------------|------------|--------------|-------------|------------------------|---------------------------|
| Tuta absoluta     | Damage     | Invacost     | 848.6637994 |                        |                           |
| Ulex europaeus    | Damage     | Interpolated | 6892.549036 | 12.38379-12383.77605   | 12383.77605-12383.77605   |
| Ulex europaeus    | Damage     | Invacost     | 0.3413954   |                        |                           |
| Ulex europaeus    | Management | Interpolated | 974.9438323 | 246.47759-246477.58915 | 246477.58915-246477.58915 |
| Ulex europaeus    | Management | Invacost     | 34.62152249 |                        |                           |
| Vulpes vulpes     | Damage     | Interpolated | 1764.130579 | 600.92061-600920.59456 | 600920.59456-600920.59456 |
| Vulpes vulpes     | Damage     | Invacost     | 238.7700004 |                        |                           |
| Vulpes vulpes     | Management | Interpolated | 38.57430696 | 11.37236-11372.36337   | 11372.36337-11372.36337   |
| Vulpes vulpes     | Management | Invacost     | 4.26873751  |                        |                           |
| Xanthium chinense | Damage     | Interpolated | 783.9169345 | 3.96196-3961.9532      | 3961.9532-3961.9532       |

|                     |            |              |             |                     |                       |
|---------------------|------------|--------------|-------------|---------------------|-----------------------|
| Xanthium chinense   | Damage     | Invacost     | 1.53951995  |                     |                       |
| Xanthium chinense   | Management | Interpolated | 22.93931034 | 0.00897-8.97831     | 8.97831-8.97831       |
| Xanthium chinense   | Management | Invacost     | 0.00601402  |                     |                       |
| Xanthium strumarium | Management | Interpolated | 265.0925632 | 11.47949-11479.4895 | 11479.4895-11479.4895 |
| Xanthium strumarium | Management | Invacost     | 0.64093614  |                     |                       |
| Xenopus laevis      | Management | Interpolated | 111.6612484 | 4.28623-4286.2387   | 4286.2387-4286.2387   |
| Xenopus laevis      | Management | Invacost     | 0.00218626  |                     |                       |

**Table S2:** Summary of the significant coefficients of the “best” models (ratio-scalar model based on AIC) and mixed model (based on the statistically significant effects) (See Table S3) for damage costs and management expenditures. Type of cost refers to the type of economic impact (damage costs or management expenditures). Model refers to ratio-scalar, mixed (GLMM) and ensemble models used. Ensemble model combines the ratio-scalar and mixed models, weighting by the fitted R2. R2 and R2 val refer to the coefficient of determination in the fitted dataset and the jackknifed validation dataset, respectively. GDP refers to Gross Domestic Product, while population size, agriculture and suitability refer to the predictors tested in each model. Time-dependent coefficient refers to the time since the invasion predictor. Standard errors generated using 1,000 bootstrapped estimates are shown between parentheses.

| Type of cost | Model        | R <sup>2</sup> | R <sup>2</sup> val | GDP            | Population size | Agriculture area | Suitability    | time-dependent coefficient | Lag phase      |
|--------------|--------------|----------------|--------------------|----------------|-----------------|------------------|----------------|----------------------------|----------------|
| Damage       | Ratio-scalar | 0.34           | 0.15               |                | 0.42 (±0.16)    | 0.38 (±0.31)     | 0.002 (±0.001) | 266.62 (±57.70)            | 47.39 (±33.54) |
| Damage       | Mixed        | 0.52           | 0.24               | 0.04 (±0.02)   |                 | 6.68 (±2.07)     | 0.005 (±0.003) |                            |                |
| Damage       | Ensemble     |                | 0.23               |                |                 |                  |                |                            |                |
| Management   | Ratio-scalar | 0.26           | 0.23               | 0.27 (±0.20)   |                 | 0.69 (±0.33)     |                |                            |                |
| Management   | Mixed        | 0.23           | 0.10               | 0.004 (±0.003) |                 |                  |                |                            |                |
| Management   | Ensemble     |                | 0.24               |                |                 |                  |                |                            |                |

**Table S3:** Top-5 ranking of models for damage costs and management expenditure based on the Akaike Information Criterion (AIC), with  $\Delta AIC$  representing the difference in AIC between the model with the lowest AIC and the model under consideration, and 'weight' indicating the probability of the model being the best model among those considered. Likelihood refers to the probability of observing the data given a specific model. Pop\_size refers to human population,  $b1$ :time-dependent coefficient and  $b2$ : lag phase.

| Model        | AIC      | Likelihood | Predictors                                 | $\Delta AIC$ | Weight |
|--------------|----------|------------|--------------------------------------------|--------------|--------|
| Damage costs |          |            |                                            |              |        |
| 29           | 1601.440 | 793.722    | Pop_size;Agriculture;suitability;b1;b2     | 0            | 0.399  |
| 31           | 1601.469 | 792.730    | GDP;Pop_size;Agriculture;suitability;b1;b2 | 0.014        | 0.397  |
| 27           | 1603.901 | 794.950    | GDP;Pop_size;suitability;b1;b2             | 2.455        | 0.117  |

|                         |          |         |                                      |        |       |
|-------------------------|----------|---------|--------------------------------------|--------|-------|
| 21                      | 1604.641 | 796.320 | suitability;Pop_size;b1;b2           | 3.195  | 0.080 |
| 28                      | 1612.660 | 800.330 | Pop_size;Agriculture;suitability;b1  | 11.214 | 0.001 |
| Management expenditures |          |         |                                      |        |       |
| 7                       | 1100.667 | 547.333 | GDP;Agriculture                      | 0      | 0.442 |
| 12                      | 1102.260 | 547.129 | GDP;Pop_size;Agriculture             | 1.592  | 0.199 |
| 11                      | 1102.497 | 547.248 | GDP;Agriculture;suitability          | 1.829  | 0.177 |
| 15                      | 1104.192 | 547.096 | GDP;Pop_size;Agriculture;suitability | 3.524  | 0.075 |
| 24                      | 1104.893 | 546.446 | GDP;Agriculture;suitability;b1       | 4.225  | 0.053 |

**Table S4:** Geographic distribution of the economic cost by invasive species at the continent level, split into damage costs and management expenditures (i.e., type). *InvaCost* refers to the cost reported in the *InvaCost* database. Total cost refers to the sum of reported costs in *InvaCost* and interpolated costs. Percentage refers to the percentage increase from reported costs in *InvaCost* to total costs.

| Continent | Type | <i>InvaCost</i> | Total costs | Percentage |
|-----------|------|-----------------|-------------|------------|
|-----------|------|-----------------|-------------|------------|

|               |            |          |          |      |
|---------------|------------|----------|----------|------|
| Africa        | Damage     | 5.970186 | 111.9379 | 1775 |
| Africa        | Management | 0.290521 | 4.990068 | 1618 |
| Africa        | Total      | 6.260707 | 116.928  | 1768 |
| Asia          | Damage     | 5.21737  | 150.7826 | 2790 |
| Asia          | Management | 0.489268 | 7.833042 | 1501 |
| Asia          | Total      | 5.706638 | 158.6156 | 2679 |
| Europe        | Damage     | 9.570592 | 199.1819 | 1981 |
| Europe        | Management | 0.896237 | 14.27156 | 1492 |
| Europe        | Total      | 10.46683 | 213.4535 | 1939 |
| North America | Damage     | 87.18261 | 188.7854 | 117  |
| North America | Management | 6.037991 | 12.47839 | 107  |
| North America | Total      | 93.2206  | 201.2638 | 116  |
| Oceania       | Damage     | 3.390868 | 26.73188 | 688  |
| Oceania       | Management | 0.339187 | 1.382057 | 307  |
| Oceania       | Total      | 3.730055 | 28.11394 | 654  |
| South America | Damage     | 6.404198 | 65.04401 | 916  |
| South America | Management | 1.023513 | 2.483305 | 143  |
| South America | Total      | 7.427711 | 67.52731 | 809  |

**Table S5:** Economic costs of invasive species at the country level, divided into damage and management costs, in US\$ billion. The *InvaCost* columns refer to the initial costs reported in the *InvaCost* database. Total costs represent the sum of the initially reported costs and the interpolated costs based on our average cost model (i.e., a combination of the ratio-scalar and mixed models, weighted by R<sup>2</sup>). Percentage increase indicates the percentage increase from the initial costs reported in *InvaCost* to the total costs.

| Country     | <i>InvaCost</i> Damage | <i>InvaCost</i> Management | Total costs Damage | Total costs Management | Percentage Increase Damage | Percentage Increase Management |
|-------------|------------------------|----------------------------|--------------------|------------------------|----------------------------|--------------------------------|
| Afghanistan | 0                      | 0                          | 0,923791008        | 0,066215213            |                            |                                |
| Albania     | 0,010769526            | 0                          | 1,989680571        | 0,050582804            | 18375,09873                |                                |
| Algeria     | 0                      | 0                          | 2,308402601        | 0,035373166            |                            |                                |
| Andorra     | 0                      | 0                          | 0,517250022        | 0,016173951            |                            |                                |
| Angola      | 0                      | 0                          | 1,449121501        | 0,092264887            |                            |                                |
| Argentina   | 2,554219447            | 0,027113945                | 10,18830557        | 0,219257939            | 298,8813718                | 708,6537637                    |
| Armenia     | 0                      | 0                          | 2,09212748         | 0,089213652            |                            |                                |
| Australia   | 2,903663631            | 0,136815446                | 9,531149845        | 0,623948789            | 228,2456598                | 356,0514225                    |
| Austria     | 0,126200633            | 8,63518E-05                | 4,345880276        | 0,260519879            | 3343,627965                | 301596,0852                    |
| Azerbaijan  | 0                      | 0                          | 2,906948545        | 0,146107373            |                            |                                |
| Bahrain     | 0                      | 0                          | 0,077640996        | 0,001213644            |                            |                                |

|                        |             |             |             |             |             |             |
|------------------------|-------------|-------------|-------------|-------------|-------------|-------------|
| Bangladesh             | 0           | 0           | 3,718338982 | 0,123094615 |             |             |
| Belarus                | 0,001820202 | 0           | 3,078398097 | 0,158707427 | 169023,9436 |             |
| Belgium                | 0           | 0           | 5,231818992 | 0,450132923 |             |             |
| Belize                 | 0,00081444  | 0,000144772 | 0,418434493 | 0,006253263 | 51276,94113 | 4219,372105 |
| Benin                  | 0,159113522 | 0           | 0,921066803 | 0,052094007 | 478,8739972 |             |
| Bhutan                 | 0,000310403 | 0           | 0,546686951 | 0,027261689 | 176021,8358 |             |
| Bolivia                | 0,043592594 | 0,000402144 | 4,395627544 | 0,074094411 | 9983,427424 | 18324,8441  |
| Bosnia and Herzegovina | 0,132723021 | 0           | 2,223263239 | 0,130823897 | 1575,115005 |             |
| Botswana               | 0           | 0           | 1,854213989 | 0,102016938 |             |             |
| Brazil                 | 0,246217973 | 0,876365159 | 10,33827563 | 1,097493629 | 4098,830616 | 25,23245794 |
| Brunei Darussalam      | 0,000669206 | 0           | 0,268579833 | 0,013716159 | 40034,10172 |             |
| Bulgaria               | 0,306855623 | 0           | 3,639113146 | 0,199215009 | 1085,9366   |             |
| Burkina Faso           | 0           | 0           | 0,796497002 | 0,059151022 |             |             |
| Burundi*               | 0           | 0           | 2,949473418 | 0,137156101 |             |             |
| Cambodia               | 0,0256575   | 0,00123331  | 1,496254043 | 0,054562612 | 5731,643921 | 4324,0784   |

|                                  |             |             |             |             |             |             |
|----------------------------------|-------------|-------------|-------------|-------------|-------------|-------------|
| Cameroon                         | 0,177855727 | 0           | 1,515779231 | 0,047093321 | 752,2521365 |             |
| Canada                           | 13,11335578 | 0,045484603 | 23,63014632 | 0,357549724 | 80,19907883 | 686,089575  |
| Cape Verde                       | 0           | 0           | 1,086752245 | 0,036118902 |             |             |
| Central African Republic         | 0           | 0           | 0,228870236 | 0,013965128 |             |             |
| Chad                             | 0           | 0           | 0,350431125 | 0,04899315  |             |             |
| Chile                            | 0,064752958 | 0,000105942 | 4,641644172 | 0,15855214  | 7068,234969 | 149559,6059 |
| China                            | 1,895464531 | 0,004539119 | 37,82164025 | 2,266007094 | 1895,375784 | 49821,73336 |
| Colombia                         | 3,248623925 | 0,111013992 | 9,272312946 | 0,269012287 | 185,422787  | 142,3228659 |
| Costa Rica                       | 0           | 0           | 6,375323937 | 0,074805836 |             |             |
| Croatia                          | 0,185508862 | 0           | 2,150846677 | 0,142499976 | 1059,430688 |             |
| Cuba                             | 0,16175062  | 0,116335344 | 6,54546148  | 0,25530789  | 3946,637654 | 119,4585771 |
| Cyprus                           | 0           | 0           | 1,529997242 | 0,040129275 |             |             |
| Czechia                          | 0,006219023 | 0,000135824 | 4,292723957 | 0,343442149 | 68925,70218 | 252759,058  |
| Democratic Republic of the Congo | 0,090099252 | 0           | 1,560719176 | 0,065991709 | 1632,222128 |             |
| Denmark                          | 0,000151684 | 0,000808015 | 6,598184512 | 0,482737865 | 4349841,284 | 59643,6488  |

|                    |             |             |             |             |             |             |
|--------------------|-------------|-------------|-------------|-------------|-------------|-------------|
| Djibouti           | 0           | 0           | 1,03963546  | 0,076886128 |             |             |
| Dominica*          | 0           | 0           | 1,219546886 | 0,068486264 |             |             |
| Dominican Republic | 0           | 0           | 5,306052039 | 0,224524567 |             |             |
| Ecuador            | 0,065747115 | 0,001664042 | 7,188904208 | 0,082277838 | 10834,17441 | 4844,458214 |
| Egypt              | 0           | 0           | 2,10098031  | 0,067988316 |             |             |
| El Salvador        | 0           | 0           | 0,627395966 | 0,02841135  |             |             |
| Equatorial Guinea  | 0           | 0           | 0,215448107 | 0,021522771 |             |             |
| Estonia            | 0           | 0           | 1,393342397 | 0,092058411 |             |             |
| Eswatini           | 0           | 0           | 2,205425629 | 0,161006457 |             |             |
| Ethiopia           | 0,409308079 | 0           | 3,365510142 | 0,1057637   | 722,2437613 |             |
| Fiji               | 0           | 0           | 1,674968087 | 0,066377975 |             |             |
| Finland            | 0,000455051 | 0,00026959  | 1,080556451 | 0,095593786 | 237358,1354 | 35358,93003 |
| France             | 0,376478327 | 0,000862153 | 16,7849997  | 1,546300047 | 4358,423893 | 179253,2764 |
| Gabon              | 0           | 0           | 0,577531826 | 0,016988932 |             |             |
| Gambia             | 0           | 0           | 0,685029671 | 0,061046661 |             |             |

|               |             |             |             |             |             |             |
|---------------|-------------|-------------|-------------|-------------|-------------|-------------|
| Georgia       | 0           | 0           | 1,812563676 | 0,139847996 |             |             |
| Germany       | 0,354683636 | 0,054280926 | 6,611339948 | 0,870615432 | 1764,010425 | 1503,906755 |
| Ghana         | 0,17307256  | 0,004000001 | 1,559443137 | 0,155881756 | 801,0343065 | 3797,042926 |
| Greece        | 0,026999655 | 0           | 4,221650317 | 0,286036368 | 15535,9415  |             |
| Greenland     | 0           | 0           | 0,39578315  | 0,001677745 |             |             |
| Guatemala     | 0,038016877 | 0,003378002 | 1,216513629 | 0,043909251 | 3099,930442 | 1199,858466 |
| Guinea        | 0           | 0           | 0,789487229 | 0,058992376 |             |             |
| Guinea-Bissau | 0           | 0           | 0,424320028 | 0,024295002 |             |             |
| Guyana        | 0           | 0           | 0,607926917 | 0,036540073 |             |             |
| Haiti         | 0           | 0           | 3,232401474 | 0,105549591 |             |             |
| Honduras      | 0           | 0           | 0,540468981 | 0,018421905 |             |             |
| Hungary       | 0,917684882 | 0           | 5,557360664 | 0,286701794 | 505,5848551 |             |
| Iceland       | 0           | 0,000546919 | 0,823344821 | 0,010669532 |             | 1850,841726 |
| India         | 1,171544319 | 1,1039E-07  | 22,66034407 | 1,074180354 | 1834,228496 | 973077492,5 |
| Indonesia     | 0,345037606 | 0,000514891 | 8,892041376 | 0,250009114 | 2477,122384 | 48455,70386 |

|             |             |             |             |             |             |             |
|-------------|-------------|-------------|-------------|-------------|-------------|-------------|
| Iran        | 0           | 0           | 1,452015564 | 0,085356565 |             |             |
| Iraq        | 0           | 0           | 1,428380531 | 0,06780655  |             |             |
| Ireland     | 0           | 0           | 8,61076445  | 0,634698529 |             |             |
| Israel      | 0           | 0           | 2,434915931 | 0,124510231 |             |             |
| Italy       | 0,343272606 | 0,003089298 | 9,224692823 | 0,806320606 | 2587,279048 | 26000,4503  |
| Ivory Coast | 0           | 9,67E-08    | 0           | 9,67E-08    |             | 0           |
| Jamaica     | 0           | 0           | 4,338609363 | 0,083787792 |             |             |
| Japan       | 0,122129957 | 0,002826797 | 8,09455716  | 0,756271006 | 6527,822841 | 26653,63323 |
| Jordan      | 0           | 0           | 0,226374541 | 0,017752817 |             |             |
| Kazakhstan  | 0           | 0           | 2,941349793 | 0,122289227 |             |             |
| Kenya       | 0,113955517 | 0           | 4,037822772 | 0,160364823 | 3443,332428 |             |
| Kiribati*   | 0           | 0           | 1,965483511 | 0,035709448 |             |             |
| Kuwait      | 0           | 0           | 0,216382142 | 0,004234344 |             |             |
| Kyrgyzstan  | 0           | 0           | 1,617885894 | 0,054566982 |             |             |
| Laos        | 0,005358902 | 0           | 0,231939498 | 0,044905719 | 4228,115736 |             |

|               |             |             |             |             |             |             |
|---------------|-------------|-------------|-------------|-------------|-------------|-------------|
| Latvia        | 0           | 0           | 3,015951005 | 0,117008574 |             |             |
| Lebanon       | 0           | 0           | 0,74437596  | 0,051595829 |             |             |
| Lesotho*      | 0           | 0           | 2,265494462 | 0,133318979 |             |             |
| Liberia       | 0           | 0           | 0,310868203 | 0,020703218 |             |             |
| Libya         | 0           | 0           | 0,126064582 | 0,026794098 |             |             |
| Liechtenstein | 0           | 0           | 1,231516262 | 0,071129142 |             |             |
| Lithuania     | 0           | 1,83993E-05 | 3,133938854 | 0,144270169 |             | 784005,5561 |
| Luxembourg    | 0           | 0           | 3,370918482 | 0,223732917 |             |             |
| Macedonia     | 0,004247138 | 0           | 1,990491036 | 0,097327107 | 46766,64772 |             |
| Madagascar    | 0           | 0           | 7,754118256 | 0,238029303 |             |             |
| Malawi        | 0,254972096 | 0           | 3,67749389  | 0,101907437 | 1342,312294 |             |
| Malaysia      | 0,343767091 | 0,106354516 | 2,514847795 | 0,173527178 | 631,5557134 | 63,15919963 |
| Mali          | 0,011421033 | 0           | 0,46698893  | 0,040350619 | 3988,850273 |             |
| Malta         | 0           | 0,000148738 | 1,650831833 | 0,108049479 |             | 72544,16073 |
| Mauritania    | 0           | 0           | 0,280029681 | 0,019649412 |             |             |

|                                     |             |             |             |             |             |             |
|-------------------------------------|-------------|-------------|-------------|-------------|-------------|-------------|
| Mauritius                           | 0           | 0           | 4,491517812 | 0,129039836 |             |             |
| Mexico                              | 0,050251048 | 0,291642029 | 10,85261903 | 0,566880925 | 21496,80132 | 94,37559326 |
| Micronesia,<br>Federated States of* | 0           | 0           | 1,786068145 | 0,05430131  |             |             |
| Moldova                             | 0,233440833 | 0           | 3,498998067 | 0,109683095 | 1398,880049 |             |
| Mongolia                            | 0           | 0           | 1,888925392 | 0,059256544 |             |             |
| Montenegro                          | 0,001971886 | 0           | 0,432950679 | 0,047550226 | 21856,17343 |             |
| Morocco                             | 0           | 0           | 4,399545171 | 0,140609179 |             |             |
| Mozambique                          | 0,141249857 | 0           | 3,513617912 | 0,092633163 | 2387,51963  |             |
| Myanmar                             | 0,015231781 | 0           | 1,110389166 | 0,069756134 | 7189,949557 |             |
| Namibia                             | 0           | 0           | 2,521446297 | 0,106539731 |             |             |
| Nepal                               | 0           | 0           | 2,087635215 | 0,045746431 |             |             |
| Netherlands                         | 8,00952E-05 | 0,078844981 | 9,104586329 | 0,746601242 | 11367105,94 | 846,9229767 |
| New Zealand                         | 0,487204018 | 0,202371951 | 10,25813684 | 0,579140696 | 2005,511541 | 186,1763668 |
| Nicaragua                           | 0           | 0,000804287 | 1,908976772 | 0,032786355 |             | 3976,449285 |
| Niger                               | 0,03709395  | 0           | 1,227063601 | 0,030469487 | 3207,988467 |             |

|                  |             |             |             |             |             |             |
|------------------|-------------|-------------|-------------|-------------|-------------|-------------|
| Nigeria          | 1,34055581  | 0           | 5,530508939 | 0,251049447 | 312,5534274 |             |
| Norway           | 0,096654372 | 0,001101859 | 2,01108267  | 0,125902034 | 1980,694985 | 11326,32599 |
| Oman             | 0           | 0           | 0,286347663 | 0,014876071 |             |             |
| Pakistan         | 0,056363727 | 0           | 1,664994318 | 0,071925463 | 2854,017408 |             |
| Panama           | 0           | 0,002081493 | 1,514881035 | 0,035630041 |             | 1611,753792 |
| Papua New Guinea | 0           | 0           | 1,516074655 | 0,022578538 |             |             |
| Paraguay         | 0,002522878 | 0,000297587 | 0,997440374 | 0,035386024 | 39435,80885 | 11790,99091 |
| Peru             | 0,136741241 | 0,003009105 | 3,589060312 | 0,071321079 | 2524,709483 | 2270,175508 |
| Philippines      | 0,294978583 | 0,157305275 | 5,206776824 | 0,311224532 | 1665,137241 | 97,84748641 |
| Poland           | 0,024724404 | 0           | 7,865042474 | 0,380676834 | 31710,84812 |             |
| Portugal         | 0,003029866 | 0           | 5,728241865 | 0,364622779 | 188959,2346 |             |
| Qatar            | 0           | 0           | 0,111335929 | 0,00087197  |             |             |
| Romania          | 1,165383958 | 0           | 6,84664648  | 0,319772017 | 487,5013493 |             |
| Russia           | 0,399837579 | 0           | 5,010337401 | 0,283289456 | 1153,093172 |             |
| Rwanda           | 0,020011211 | 0           | 2,32999294  | 0,144559018 | 11543,43824 |             |

|                        |             |             |             |             |             |             |
|------------------------|-------------|-------------|-------------|-------------|-------------|-------------|
| Saint Kitts and Nevis* | 0           | 4,51482E-05 | 0,97040574  | 0,043179357 |             | 95539,07011 |
| San Marino             | 0           | 0           | 0,543124792 | 0,010794036 |             |             |
| Saudi Arabia           | 0           | 0           | 3,07143034  | 0,192860053 |             |             |
| Senegal                | 0,012201958 | 1,42446E-06 | 1,323397627 | 0,086356336 | 10745,78084 | 6062291,108 |
| Serbia                 | 0,582616138 | 0           | 3,525589876 | 0,126514739 | 505,1308308 |             |
| Sierra Leone           | 0           | 0           | 0,63507868  | 0,052518926 |             |             |
| Singapore              | 0,128540064 | 0,054485751 | 0,645678024 | 0,087984718 | 402,3165573 | 61,48206944 |
| Slovakia               | 0,150621668 | 0           | 2,931648187 | 0,164820968 | 1846,3655   |             |
| Slovenia               | 0,027303022 | 0           | 2,920477586 | 0,155779151 | 10596,53593 |             |
| Somalia                | 0           | 0           | 0,845667837 | 0,059380536 |             |             |
| South Africa           | 2,144310778 | 0,286519344 | 19,7319542  | 0,920704641 | 820,2002994 | 221,3411794 |
| South Korea            | 0           | 0           | 1,492244557 | 0,029527224 |             |             |
| Spain                  | 0,014409929 | 0,003531358 | 7,651538783 | 0,655839343 | 52999,07385 | 18471,8731  |
| Sri Lanka              | 4,43996E-05 | 0,000103871 | 5,064659793 | 0,184711564 | 11406904,47 | 177728,6873 |
| Sudan                  | 0           | 0           | 1,799713267 | 0,068677659 |             |             |

|                      |             |             |             |             |             |             |
|----------------------|-------------|-------------|-------------|-------------|-------------|-------------|
| Suriname             | 0,001461966 | 0           | 0,173993102 | 0,002894712 | 11801,30764 |             |
| Sweden               | 0,059049733 | 0,025508161 | 2,654457041 | 0,307099566 | 4395,290504 | 1103,926721 |
| Switzerland          | 0,00743249  | 0           | 4,634385609 | 0,356185704 | 62253,06787 |             |
| Syrian Arab Republic | 0           | 0           | 0,990865595 | 0,081604985 |             |             |
| Tajikistan           | 0           | 0           | 0,4166177   | 0,026062653 |             |             |
| Tanzania             | 0,44413977  | 0           | 4,182731391 | 0,136255779 | 841,760157  |             |
| Thailand             | 0,616747969 | 0,154319692 | 4,091076987 | 0,317068762 | 563,3304357 | 105,4622831 |
| Timor-Leste          | 0,000381953 | 0           | 0,30130284  | 0,047853281 | 78784,80905 |             |
| Togo                 | 0           | 0           | 0,82897491  | 0,07835793  |             |             |
| Trinidad and Tobago  | 0           | 0           | 0,509294512 | 0,05585343  |             |             |
| Tunisia              | 0           | 0           | 3,853640488 | 0,101578279 |             |             |
| Turkey               | 0,098139194 | 0           | 6,345199569 | 0,246343626 | 6365,510166 |             |
| Uganda               | 0,195809683 | 0           | 4,263515163 | 0,247530952 | 2077,377083 |             |
| Ukraine              | 1,510312127 | 0           | 10,43365023 | 0,370574762 | 590,8274152 |             |
| United Arab Emirates | 0           | 0           | 1,701523833 | 0,03021768  |             |             |

|                          |             |             |             |             |             |             |
|--------------------------|-------------|-------------|-------------|-------------|-------------|-------------|
| United Kingdom           | 2,499654336 | 0,727004563 | 20,04214572 | 2,114835868 | 701,7966896 | 190,8971931 |
| United States of America | 73,85725143 | 5,581598249 | 120,3057798 | 10,47465395 | 62,88959781 | 87,66406119 |
| Uruguay                  | 0,001486798 | 1,60867E-05 | 8,503349194 | 0,188328603 | 571823,8176 | 1170608,529 |
| Uzbekistan               | 0           | 0           | 1,734797907 | 0,044195949 |             |             |
| Venezuela                | 0           | 2,18626E-06 | 3,51221925  | 0,197984183 |             | 9055738,857 |
| Vietnam                  | 0,097002782 | 0,007584417 | 3,849036208 | 0,116696802 | 3867,96476  | 1438,638978 |
| Yemen                    | 0           | 0           | 1,673587221 | 0,059881869 |             |             |
| Zambia                   | 0,163994305 | 0           | 1,662777428 | 0,061101508 | 913,9238873 |             |
| Zimbabwe                 | 0,081020996 | 0           | 1,829466383 | 0,100997022 | 2158,015181 |             |
| Afghanistan              | 0           | 0           | 0,923791008 | 0,066215213 |             |             |

\*\* Cost exceed annual GDP of the given country

Table S6: Overview of the unique identifier (Taxa key), taxonomic group and the digital object identifier (DOIs) linked to the source of the data, associated with each species.

The species records were downloaded using the *occ\_download* function of *rgbif* R package<sup>9</sup>.

To minimize the inherent errors present in public data aggregators such as GBIF, e.g., data-entry errors<sup>10</sup>, we limited our species data to records classified as “present” status, recorded from

“observation”, “human observation”, and “occurrence” with a geographic uncertainty of < 10 kilometers. In addition, we used the *clean\_coordinates* function of the `CoordinateCleaner` R package<sup>11</sup> as an additional cleaning step to flag errors that are common to biological collections and to remove them as they are potentially erroneous. Lastly, species with occurrence data in less than 10 grid cells (resolution 5 X 5 arc-min, 0.0833 degrees) were removed as a minimum threshold to build SDMs<sup>12</sup>.

| Species                        | Taxonomic group | Taxa key | DOIs               |
|--------------------------------|-----------------|----------|--------------------|
| <i>Lithobates catesbeianus</i> | Amphibia        | 2427091  | 10.15468/dl.afu4ph |
| <i>Rhinella marina</i>         | Amphibia        | 5216933  | 10.15468/dl.ypecw2 |
| <i>Xenopus laevis</i>          | Amphibia        | 5217334  | 10.15468/dl.4yjfty |
| <i>Adelges piceae</i>          | Arthropods      | 2049681  | 10.15468/dl.paemdc |
| <i>Adelges tsugae</i>          | Arthropods      | 2049739  | 10.15468/dl.sj8hhc |
| <i>Aedes aegypti</i>           | Arthropods      | 1651891  | 10.15468/dl.94bp5x |
| <i>Aedes albopictus</i>        | Arthropods      | 1651430  | 10.15468/dl.d67tjh |

|                                 |            |         |                    |
|---------------------------------|------------|---------|--------------------|
| <i>Aedes camptorhynchus</i>     | Arthropods | 1652230 | 10.15468/dl.bgfe5r |
| <i>Agrilus planipennis</i>      | Arthropods | 5878492 | 10.15468/dl.xftmn9 |
| <i>Anoplophora chinensis</i>    | Arthropods | 7987143 | 10.15468/dl.hnkqpb |
| <i>Anoplophora glabripennis</i> | Arthropods | 7572133 | 10.15468/dl.h6ferr |
| <i>Apis mellifera</i>           | Arthropods | 1341976 | 10.15468/dl.5xe6ba |
| <i>Bactrocera tryoni</i>        | Arthropods | 5087530 | 10.15468/dl.nhyp34 |
| <i>Bemisia tabaci</i>           | Arthropods | 8347721 | 10.15468/dl.uzaj4v |
| <i>Cactoblastis cactorum</i>    | Arthropods | 1870532 | 10.15468/dl.aawh6j |
| <i>Cameraria ohridella</i>      | Arthropods | 1749449 | 10.15468/dl.b6cgk3 |
| <i>Ceratitis capitata</i>       | Arthropods | 1626096 | 10.15468/dl.ed3529 |
| <i>Ceutorhynchus obstrictus</i> | Arthropods | 4464290 | 10.15468/dl.38ba9q |
| <i>Coptotermes formosanus</i>   | Arthropods | 2007383 | 10.15468/dl.uvcyve |

|                                   |            |          |                    |
|-----------------------------------|------------|----------|--------------------|
| <i>Cryptotermes brevis</i>        | Arthropods | 2007322  | 10.15468/dl.vsz8v2 |
| <i>Cydia pomonella</i>            | Arthropods | 1737847  | 10.15468/dl.rg4xj2 |
| <i>Dendroctonus micans</i>        | Arthropods | 1228061  | 10.15468/dl.r2gqze |
| <i>Drosophila suzukii</i>         | Arthropods | 5073820  | 10.15468/dl.mjzznz |
| <i>Elatobium abietinum</i>        | Arthropods | 2076533  | 10.15468/dl.g7bb4t |
| <i>Ephestia kuehniella</i>        | Arthropods | 1878490  | 10.15468/dl.rmjy6  |
| <i>Frankliniella occidentalis</i> | Arthropods | 8351995  | 10.15468/dl.pxenqx |
| <i>Haematobia irritans</i>        | Arthropods | 10134580 | 10.15468/dl.gnzfmc |
| <i>Homarus americanus</i>         | Arthropods | 5972004  | 10.15468/dl.h8j77q |
| <i>Hyblaea puera</i>              | Arthropods | 1992315  | 10.15468/dl.w3uwfz |
| <i>Hypera postica</i>             | Arthropods | 1191191  | 10.15468/dl.upamrr |
| <i>Leptinotarsa decemlineata</i>  | Arthropods | 1047536  | 10.15468/dl.364csk |

|                                  |            |         |                    |
|----------------------------------|------------|---------|--------------------|
| <i>Linepithema humile</i>        | Arthropods | 1316908 | 10.15468/dl.6k9w82 |
| <i>Pacifastacus leniusculus</i>  | Arthropods | 2226990 | 10.15468/dl.yyfcyf |
| <i>Procambarus clarkii</i>       | Arthropods | 2227300 | 10.15468/dl.xbd8d5 |
| <i>Rhynchophorus ferrugineus</i> | Arthropods | 6132234 | 10.15468/dl.azdxew |
| <i>Sirex noctilio</i>            | Arthropods | 4492199 | 10.15468/dl.k2fpkt |
| <i>Solenopsis invicta</i>        | Arthropods | 5035230 | 10.15468/dl.wgvtav |
| <i>Spodoptera frugiperda</i>     | Arthropods | 5109855 | 10.15468/dl.t5uue8 |
| <i>Stomoxys calcitrans</i>       | Arthropods | 1526081 | 10.15468/dl.3fmvwj |
| <i>Tuta absoluta</i>             | Arthropods | 4528099 | 10.15468/dl.j9zw2e |
| <i>Alopochen aegyptiaca</i>      | Birds      | 2498252 | 10.15468/dl.d68hbb |
| <i>Branta canadensis</i>         | Birds      | 5232437 | 10.15468/dl.v8njzt |
| <i>Columba livia</i>             | Birds      | 2495414 | 10.15468/dl.jhv5xt |

|                                |          |         |                    |
|--------------------------------|----------|---------|--------------------|
| <i>Cygnus olor</i>             | Birds    | 2498343 | 10.15468/dl.k3r8gu |
| <i>Myiopsitta monachus</i>     | Birds    | 2479407 | 10.15468/dl.79tfhc |
| <i>Oxyura jamaicensis</i>      | Birds    | 2498305 | 10.15468/dl.mz7a25 |
| <i>Passer domesticus</i>       | Birds    | 5231190 | 10.15468/dl.szf26w |
| <i>Phasianus colchicus</i>     | Birds    | 9752149 | 10.15468/dl.sjymtv |
| <i>Psittacula krameri</i>      | Birds    | 2479226 | 10.15468/dl.z9hpgr |
| <i>Sturnus vulgaris</i>        | Birds    | 9809229 | 10.15468/dl.cp5mdk |
| <i>Petromyzon marinus</i>      | Fish     | 8236498 | 10.15468/dl.stc76q |
| <i>Phoxinus phoxinus</i>       | Fish     | 4409653 | 10.15468/dl.enft83 |
| <i>Pseudorasbora parva</i>     | Fish     | 2362868 | 10.15468/dl.snama3 |
| <i>Tinca tinca</i>             | Fish     | 2362524 | 10.15468/dl.gq9rdx |
| <i>Callosciurus erythraeus</i> | Mammalia | 4263753 | 10.15468/dl.rv3u6e |

|                                |          |          |                    |
|--------------------------------|----------|----------|--------------------|
| <i>Camelus dromedarius</i>     | Mammalia | 9055455  | 10.15468/dl.6knez9 |
| <i>Canis lupus</i>             | Mammalia | 5219200  | 10.15468/dl.t7wvd5 |
| <i>Capra hircus</i>            | Mammalia | 2441056  | 10.15468/dl.yaz4sg |
| <i>Castor canadensis</i>       | Mammalia | 2439838  | 10.15468/dl.vdyhyt |
| <i>Chlorocebus pygerythrus</i> | Mammalia | 4267120  | 10.15468/dl.65tqh9 |
| <i>Equus caballus</i>          | Mammalia | 2440886  | 10.15468/dl.a2tzpt |
| <i>Felis catus</i>             | Mammalia | 2435035  | 10.15468/dl.5598fk |
| <i>Hemitragus jemlahicus</i>   | Mammalia | 5220174  | 10.15468/dl.8umq8d |
| <i>Herpestes edwardsi</i>      | Mammalia | 10937769 | 10.15468/dl.z2q6x5 |
| <i>Herpestes javanicus</i>     | Mammalia | 10504616 | 10.15468/dl.727f5s |
| <i>Muntiacus reevesi</i>       | Mammalia | 2440946  | 10.15468/dl.s58645 |
| <i>Mus musculus</i>            | Mammalia | 7429082  | 10.15468/dl.awdhcw |

|                                 |          |         |                    |
|---------------------------------|----------|---------|--------------------|
| <i>Mustela erminea</i>          | Mammalia | 5219019 | 10.15468/dl.xhd7hr |
| <i>Myocastor coypus</i>         | Mammalia | 4264680 | 10.15468/dl.p6dqyx |
| <i>Neovison vison</i>           | Mammalia | 2433652 | 10.15468/dl.a7y8nb |
| <i>Nyctereutes procyonoides</i> | Mammalia | 2434552 | 10.15468/dl.v9zh3r |
| <i>Ondatra zibethicus</i>       | Mammalia | 5219858 | 10.15468/dl.qysztu |
| <i>Oryctolagus cuniculus</i>    | Mammalia | 2436940 | 10.15468/dl.sqyy7e |
| <i>Paguma larvata</i>           | Mammalia | 2434654 | 10.15468/dl.e86hpb |
| <i>Phascolarctos cinereus</i>   | Mammalia | 2440012 | 10.15468/dl.hcgp6p |
| <i>Procyon lotor</i>            | Mammalia | 5218786 | 10.15468/dl.uh8ubq |
| <i>Rattus exulans</i>           | Mammalia | 2439244 | 10.15468/dl.74mvee |
| <i>Rattus norvegicus</i>        | Mammalia | 2439261 | 10.15468/dl.6yscy7 |
| <i>Rattus rattus</i>            | Mammalia | 2439270 | 10.15468/dl.n57xej |

|                              |          |         |                    |
|------------------------------|----------|---------|--------------------|
| <i>Sciurus carolinensis</i>  | Mammalia | 5219681 | 10.15468/dl.9pb6n8 |
| <i>Sus scrofa</i>            | Mammalia | 7705930 | 10.15468/dl.azmx62 |
| <i>Trichosurus vulpecula</i> | Mammalia | 2440254 | 10.15468/dl.w5ukd5 |
| <i>Vulpes vulpes</i>         | Mammalia | 5219243 | 10.15468/dl.he94qx |
| <i>Corbicula fluminea</i>    | Molluks  | 8190231 | 10.15468/dl.zubgcs |
| <i>Dreissena polymorpha</i>  | Molluks  | 2287072 | 10.15468/dl.ycsap4 |
| <i>Lissachatina fulica</i>   | Molluks  | 8790531 | 10.15468/dl.aufhcj |
| <i>Pomacea canaliculata</i>  | Mollusk  | 2292582 | 10.15468/dl.xukp46 |
| <i>Arion lusitanicus</i>     | Mollusks | 5779455 | 10.15468/dl.nenerb |
| <i>Acacia mearnsii</i>       | Plants   | 2979775 | 10.15468/dl.k59hwr |
| <i>Ageratina adenophora</i>  | Plants   | 5400613 | 10.15468/dl.yugwpb |
| <i>Ailanthus altissima</i>   | Plants   | 3190653 | 10.15468/dl.3u2yca |

|                                    |        |         |                    |
|------------------------------------|--------|---------|--------------------|
| <i>Alternanthera philoxeroides</i> | Plants | 3084923 | 10.15468/dl.ay7cgx |
| <i>Ambrosia artemisiifolia</i>     | Plants | 8002952 | 10.15468/dl.5msz59 |
| <i>Arctotheca calendula</i>        | Plants | 3114986 | 10.15468/dl.azxx28 |
| <i>Artemisia vulgaris</i>          | Plants | 3120946 | 10.15468/dl.ba67nk |
| <i>Azolla filiculoides</i>         | Plants | 2650107 | 10.15468/dl.krrxek |
| <i>Buddleja davidii</i>            | Plants | 3173338 | 10.15468/dl.hkme7j |
| <i>Cabomba caroliniana</i>         | Plants | 2882443 | 10.15468/dl.havvn3 |
| <i>Carduus platypus</i>            | Plants | 3114515 | 10.15468/dl.vhs2ry |
| <i>Cenchrus clandestinus</i>       | Plants | 5828201 | 10.15468/dl.d7swut |
| <i>Cenchrus setaceus</i>           | Plants | 5828232 | 10.15468/dl.gvyujk |
| <i>Cereus jamacaru</i>             | Plants | 7282182 | 10.15468/dl.s344bq |
| <i>Chondrilla juncea</i>           | Plants | 8537667 | 10.15468/dl.4b4765 |

|                                 |        |         |                    |
|---------------------------------|--------|---------|--------------------|
| <i>Chromolaena odorata</i>      | Plants | 3087725 | 10.15468/dl.e2wuxh |
| <i>Cirsium arvense</i>          | Plants | 3113414 | 10.15468/dl.h22skm |
| <i>Clematis vitalba</i>         | Plants | 3033558 | 10.15468/dl.nw5cxh |
| <i>Coreopsis lanceolata</i>     | Plants | 3133938 | 10.15468/dl.4rr74m |
| <i>Cortaderia selloana</i>      | Plants | 2704523 | 10.15468/dl.9wcpwr |
| <i>Crassula helmsii</i>         | Plants | 5362054 | 10.15468/dl.8f7qx6 |
| <i>Cryptostegia grandiflora</i> | Plants | 3170473 | 10.15468/dl.qe3g4t |
| <i>Cytisus scoparius</i>        | Plants | 5354656 | 10.15468/dl.yrtbqz |
| <i>Echium plantagineum</i>      | Plants | 2925895 | 10.15468/dl.ha4vmj |
| <i>Pontederia crassipes</i>     | Plants | 2765940 | 10.15468/dl.7h9umj |
| <i>Elaeis guineensis</i>        | Plants | 2731882 | 10.15468/dl.pp53mw |
| <i>Elodea nuttallii</i>         | Plants | 5329212 | 10.15468/dl.zhee3f |

|                                  |        |          |                    |
|----------------------------------|--------|----------|--------------------|
| <i>Euphorbia esula</i>           | Plants | 8203538  | 10.15468/dl.p65466 |
| <i>Fallopia baldschuanica</i>    | Plants | 5334351  | 10.15468/dl.m9kq2b |
| <i>Hakea sericea</i>             | Plants | 7287606  | 10.15468/dl.jkf9e4 |
| <i>Heliotropium europaeum</i>    | Plants | 2925767  | 10.15468/dl.veqbm9 |
| <i>Heracleum mantegazzianum</i>  | Plants | 3034825  | 10.15468/dl.f3387y |
| <i>Hydrocotyle ranunculoides</i> | Plants | 7978544  | 10.15468/dl.fscv5r |
| <i>Impatiens glandulifera</i>    | Plants | 2891770  | 10.15468/dl.2cm2hp |
| <i>Lagarosiphon major</i>        | Plants | 11342546 | 10.15468/dl.cfvcfe |
| <i>Lantana camara</i>            | Plants | 2925303  | 10.15468/dl.4zhxe5 |
| <i>Lonicera japonica</i>         | Plants | 5334240  | 10.15468/dl.zq263k |
| <i>Ludwigia grandiflora</i>      | Plants | 5421039  | 10.15468/dl.rxarv2 |
| <i>Marrubium vulgare</i>         | Plants | 2927069  | 10.15468/dl.e68ywd |

|                                 |        |         |                    |
|---------------------------------|--------|---------|--------------------|
| <i>Melia azedarach</i>          | Plants | 5914287 | 10.15468/dl.cjb84p |
| <i>Mimosa diplotricha</i>       | Plants | 7808904 | 10.15468/dl.7uu5ra |
| <i>Mimosa pigra</i>             | Plants | 2969431 | 10.15468/dl.em5uf5 |
| <i>Myriophyllum aquaticum</i>   | Plants | 5361785 | 10.15468/dl.ezku3j |
| <i>Nassella neesiana</i>        | Plants | 5289831 | 10.15468/dl.zfb6v4 |
| <i>Nassella trichotoma</i>      | Plants | 9613389 | 10.15468/dl.p7ytub |
| <i>Nymphoides peltata</i>       | Plants | 8810827 | 10.15468/dl.m63e5t |
| <i>Opuntia aurantiaca</i>       | Plants | 5384186 | 10.15468/dl.c92d9w |
| <i>Panicum repens</i>           | Plants | 2705093 | 10.15468/dl.h4a8nz |
| <i>Parkinsonia aculeata</i>     | Plants | 5357217 | 10.15468/dl.66h6gz |
| <i>Parthenium hysterophorus</i> | Plants | 3086784 | 10.15468/dl.g3ga4v |
| <i>Phelipanche aegyptiaca</i>   | Plants | 3729265 | 10.15468/dl.gbarrv |

|                                 |        |         |                    |
|---------------------------------|--------|---------|--------------------|
| <i>Phragmites australis</i>     | Plants | 5290149 | 10.15468/dl.wyjvuu |
| <i>Pistia stratiotes</i>        | Plants | 2870583 | 10.15468/dl.7c3azk |
| <i>Prunus serotina</i>          | Plants | 3021850 | 10.15468/dl.ujdmjs |
| <i>Pteridium aquilinum</i>      | Plants | 5275012 | 10.15468/dl.kjdcg6 |
| <i>Reynoutria japonica</i>      | Plants | 2889173 | 10.15468/dl.xjy44r |
| <i>Rhododendron ponticum</i>    | Plants | 7327990 | 10.15468/dl.gbvy2m |
| <i>Rosa rugosa</i>              | Plants | 3003979 | 10.15468/dl.896jj7 |
| <i>Rumex lunaria</i>            | Plants | 4032398 | 10.15468/dl.amjj27 |
| <i>Salvinia molesta</i>         | Plants | 5274863 | 10.15468/dl.nf7thz |
| <i>Senecio inaequidens</i>      | Plants | 3109086 | 10.15468/dl.rxw2gq |
| <i>Senecio jacobaea</i>         | Plants | 8965572 | 10.15468/dl.uebqnu |
| <i>Senecio madagascariensis</i> | Plants | 3107722 | 10.15468/dl.j2w7dj |

|                               |          |         |                    |
|-------------------------------|----------|---------|--------------------|
| <i>Senna obtusifolia</i>      | Plants   | 2957408 | 10.15468/dl.wxf998 |
| <i>Solanum mauritianum</i>    | Plants   | 2931469 | 10.15468/dl.7wuwgx |
| <i>Sporobolus pyramidalis</i> | Plants   | 4117345 | 10.15468/dl.awkksm |
| <i>Tamarix aphylla</i>        | Plants   | 2874704 | 10.15468/dl.ufs22k |
| <i>Ulex europaeus</i>         | Plants   | 2951984 | 10.15468/dl.6eqk7c |
| <i>Xanthium chinense</i>      | Plants   | 3089169 | 10.15468/dl.b77dmw |
| <i>Xanthium strumarium</i>    | Plants   | 3089154 | 10.15468/dl.b44mvn |
| <i>Anolis carolinensis</i>    | Reptilia | 2466939 | 10.15468/dl.2gwphr |
| <i>Boiga irregularis</i>      | Reptilia | 2457884 | 10.15468/dl.49pef9 |
| <i>Chelydra serpentina</i>    | Reptilia | 2441905 | 10.15468/dl.rnqs4y |
| <i>Trachemys scripta</i>      | Reptilia | 6157026 | 10.15468/dl.xvavss |



**Table S7:** Description of the predictors, sources and rationale used for species distribution models. Variables retained after the collinearity analysis are in *italics* and **bold**.

| <b>Predictors</b>                         | <b>Description</b>                                                                                                                                                                                                                                                                                           | <b>Source</b>                                               | <b>Rationale</b>                                                                                                                                                                    |
|-------------------------------------------|--------------------------------------------------------------------------------------------------------------------------------------------------------------------------------------------------------------------------------------------------------------------------------------------------------------|-------------------------------------------------------------|-------------------------------------------------------------------------------------------------------------------------------------------------------------------------------------|
| <i>species occurrences (See Table S1)</i> | Records of species presence worldwide                                                                                                                                                                                                                                                                        | Global Biodiversity Information Facility (GBIF; gbif.org)   | Location where the species is found.                                                                                                                                                |
| <i>Elevation</i>                          | Vertical position of a location or feature on the Earth's surface                                                                                                                                                                                                                                            | EarthEnv <sup>13</sup>                                      | Elevation often imposes physiological limits on species                                                                                                                             |
| <i>Slope</i>                              | Measure of the steepness or incline of a surface or terrain                                                                                                                                                                                                                                                  | EarthEnv <sup>13</sup>                                      | Steepness of terrain can affect species dispersal and establishment                                                                                                                 |
| <i>Rugosity</i>                           | Deviation of the land surface from a perfectly flat plane                                                                                                                                                                                                                                                    | EarthEnv <sup>13</sup>                                      | Roughness of the terrain can impact a species' ability to move and establish new populations                                                                                        |
| Evapotranspiration                        | Represents loss of water to the atmosphere from the land, bodies of water, and vegetation                                                                                                                                                                                                                    | The Global Evapotranspiration CHELSA database <sup>14</sup> | For species depending on specific moisture conditions; can also be a limiting factor in arid or extremely humid areas                                                               |
| <i>Density of roads</i>                   | Proxy for proximity and accessibility to transportation infrastructure                                                                                                                                                                                                                                       | The Global Roads Open Access Data Set, Version 115          | Roads facilitate human movement and can act as corridors for species spread                                                                                                         |
| <i>Distance to major cities</i>           | Locations of main cities of the world, such as provincial capitals                                                                                                                                                                                                                                           | hub.arcgis.com                                              | Cities often serve as primary introduction points for invasive species and have high concentrations of transportation networks, which can facilitate the spread of invasive species |
| <i>Bioclimatic variables</i>              | 19 bioclimatic variables derived from the monthly temperature and rainfall values:<br>infrastructure<br>BIO1: annual mean temperature<br><b>BIO2: mean diurnal range (mean of monthly (max temp - min temp))</b><br><b>BIO3: isothermality (bio2/bio7) (×100)</b><br>BIO4: temperature seasonality (standard | WorldClim <sup>16</sup>                                     | Climate is a major determinant of species distribution. Bioclimatic variables can indicate the potential range of an invasive species                                               |

|  |                                                                                                                                                                                                                                                                                                                                                                                                                                                                                                                                                                                                                                                                                                                                                                    |  |  |
|--|--------------------------------------------------------------------------------------------------------------------------------------------------------------------------------------------------------------------------------------------------------------------------------------------------------------------------------------------------------------------------------------------------------------------------------------------------------------------------------------------------------------------------------------------------------------------------------------------------------------------------------------------------------------------------------------------------------------------------------------------------------------------|--|--|
|  | deviation $\times 100$ )<br>BIO5: maximum temperature of warmest month<br>BIO6: minimum temperature of coldest month<br>BIO7: temperature annual range (bio5-bio6)<br><b>BIO8: mean temperature of wettest quarter</b><br><b>BIO9: mean temperature of driest quarter</b><br>BIO10: mean temperature of warmest quarter<br>BIO11: mean temperature of coldest quarter<br>BIO12: annual precipitation<br><b>BIO13: precipitation of wettest month</b><br><b>BIO14: precipitation of driest month</b><br><b>BIO15: precipitation seasonality (coefficient of variation)</b><br>BIO16: precipitation of wettest quarter<br>BIO17: precipitation of driest quarter<br><b>BIO18: precipitation of warmest quarter</b><br><b>BIO19: precipitation of coldest quarter</b> |  |  |
|--|--------------------------------------------------------------------------------------------------------------------------------------------------------------------------------------------------------------------------------------------------------------------------------------------------------------------------------------------------------------------------------------------------------------------------------------------------------------------------------------------------------------------------------------------------------------------------------------------------------------------------------------------------------------------------------------------------------------------------------------------------------------------|--|--|

\*To do this, we rasterized the roads layer using the *rasterize* function in the `terra` R package (Hijmans et al., 2022), and generated a density raster layer summing the number of roads in each cell grid (Hijmans et al., 2022).

### Supplementary Material 3:

#### *Importance of spatio-temporal predictors*

The species distribution models generally performed well (area under the receiver operating characteristic curve [mean AUC  $\pm$  sd] =  $0.88 \pm 0.07$ ; true skill statistics [mean TSS  $\pm$  sd] =  $0.70 \pm 0.09$ ) and Boyce index [mean  $\pm$  sd] =  $0.76 \pm 0.09$  (Table S8). Additionally, the inclusion of suitable area and time since invasion as predictive factors significantly improved estimates of interpolated damage and management costs (Table S2; Table S3). In the case of damage, the best-fitting model included three predictor variables (i.e., GDP, population size, agriculture area and suitable area) (AIC = 1601.440; AIC<sub>weighted</sub> = 0.399), all of them with a positive effect (Table S2). For the damage model, the suitable area was adjusted by both time since invasion and lag phase (equation 1). This lag phase was estimated to be 46 years of delay to the start of the economic damage. For management expenditure, the most optimal model included only GDP and suitable area (adjusted by the time since invasion, equation 1) as predictors (AIC = 1100.66; AIC<sub>weighted</sub> = 0.442), both with a positive effect (Table S3).

**Table S8:** Performance of the species distribution models (GAMs and maxent) based on area under the receiver operating curve (AUC), true skill statistic (TSS) and Boyce index.

| Species                            | AUC   | TSS   | Boyce index |
|------------------------------------|-------|-------|-------------|
| <i>Acacia mearnsii</i>             | 0.949 | 0.817 | 0.919       |
| <i>Adelges piceae</i>              | 0.911 | 0.698 | 0.641       |
| <i>Adelges tsugae</i>              | 0.95  | 0.624 | 0.833       |
| <i>Aedes aegypti</i>               | 0.886 | 0.811 | 0.888       |
| <i>Aedes albopictus</i>            | 0.831 | 0.637 | 0.957       |
| <i>Aedes camptorhynchus</i>        | 0.767 | 0.613 | 0.839       |
| <i>Ageratina adenophora</i>        | 0.97  | 0.81  | 0.860       |
| <i>Agrilus planipennis</i>         | 0.945 | 0.627 | 0.745       |
| <i>Ailanthus altissima</i>         | 0.828 | 0.681 | 0.833       |
| <i>Alopochen aegyptiaca</i>        | 0.891 | 0.707 | 0.747       |
| <i>Alternanthera philoxeroides</i> | 0.967 | 0.792 | 0.908       |
| <i>Ambrosia artemisiifolia</i>     | 0.849 | 0.637 | 0.755       |

|                                 |       |       |       |
|---------------------------------|-------|-------|-------|
| <i>Anolis carolinensis</i>      | 0.952 | 0.836 | 0.846 |
| <i>Anoplophora chinensis</i>    | 0.942 | 0.732 | 0.845 |
| <i>Anoplophora glabripennis</i> | 0.816 | 0.689 | 0.891 |
| <i>Apis mellifera</i>           | 0.714 | 0.685 | 0.823 |
| <i>Arctotheca calendula</i>     | 0.967 | 0.852 | 0.841 |
| <i>Arion lusitanicus</i>        | 0.971 | 0.641 | 0.795 |
| <i>Artemisia vulgaris</i>       | 0.793 | 0.54  | 0.826 |
| <i>Azolla filiculoides</i>      | 0.85  | 0.595 | 0.835 |
| <i>Bactrocera tryoni</i>        | 0.706 | 0.532 | 0.791 |
| <i>Bemisia tabaci</i>           | 0.565 | 0.545 | 0.891 |
| <i>Boiga irregularis</i>        | 0.911 | 0.696 | 0.809 |
| <i>Branta canadensis</i>        | 0.829 | 0.592 | 0.716 |
| <i>Buddleja davidii</i>         | 0.782 | 0.63  | 0.695 |
| <i>Cabomba caroliniana</i>      | 0.882 | 0.705 | 0.818 |

|                                 |       |       |       |
|---------------------------------|-------|-------|-------|
| <i>Cactoblastis cactorum</i>    | 0.688 | 0.576 | 0.804 |
| <i>Callosciurus erythraeus</i>  | 0.906 | 0.585 | 0.807 |
| <i>Camelus dromedarius</i>      | 0.985 | 0.86  | 0.770 |
| <i>Cameraria ohridella</i>      | 0.94  | 0.701 | 0.768 |
| <i>Canis lupus</i>              | 0.773 | 0.484 | 0.762 |
| <i>Capra hircus</i>             | 0.88  | 0.578 | 0.614 |
| <i>Carduus platypus</i>         | 0.973 | 0.578 | 0.807 |
| <i>Castor canadensis</i>        | 0.877 | 0.618 | 0.703 |
| <i>Cenchrus clandestinus</i>    | 0.972 | 0.815 | 0.740 |
| <i>Cenchrus setaceus</i>        | 0.92  | 0.631 | 0.697 |
| <i>Ceratitis capitata</i>       | 0.894 | 0.541 | 0.805 |
| <i>Cereus jamacaru</i>          | 0.979 | 0.558 | 0.867 |
| <i>Ceutorhynchus obstrictus</i> | 0.954 | 0.652 | 0.590 |
| <i>Chelydra serpentina</i>      | 0.943 | 0.798 | 0.689 |

|                                 |       |       |       |
|---------------------------------|-------|-------|-------|
| <i>Chlorocebus pygerythrus</i>  | 0.983 | 0.821 | 0.866 |
| <i>Chondrilla juncea</i>        | 0.843 | 0.554 | 0.689 |
| <i>Chromolaena odorata</i>      | 0.972 | 0.793 | 0.806 |
| <i>Cirsium arvense</i>          | 0.77  | 0.566 | 0.564 |
| <i>Clematis vitalba</i>         | 0.797 | 0.523 | 0.653 |
| <i>Columba livia</i>            | 0.829 | 0.575 | 0.675 |
| <i>Coptotermes formosanus</i>   | 0.774 | 0.591 | 0.654 |
| <i>Corbicula fluminea</i>       | 0.838 | 0.5   | 0.676 |
| <i>Coreopsis lanceolata</i>     | 0.891 | 0.601 | 0.688 |
| <i>Cortaderia selloana</i>      | 0.874 | 0.566 | 0.667 |
| <i>Crassula helmsii</i>         | 0.932 | 0.694 | 0.666 |
| <i>Cryptostegia grandiflora</i> | 0.978 | 0.807 | 0.732 |
| <i>Cryptotermes brevis</i>      | 0.79  | 0.516 | 0.629 |
| <i>Cydia pomonella</i>          | 0.887 | 0.562 | 0.574 |

|                               |       |       |       |
|-------------------------------|-------|-------|-------|
| <i>Cygnus olor</i>            | 0.926 | 0.719 | 0.769 |
| <i>Cytisus scoparius</i>      | 0.803 | 0.695 | 0.565 |
| <i>Dendroctonus micans</i>    | 0.945 | 0.522 | 0.887 |
| <i>Dreissena polymorpha</i>   | 0.892 | 0.539 | 0.721 |
| <i>Drosophila suzukii</i>     | 0.886 | 0.587 | 0.774 |
| <i>Echium plantagineum</i>    | 0.897 | 0.644 | 0.766 |
| <i>Elaeis guineensis</i>      | 0.768 | 0.545 | 0.645 |
| <i>Elatobium abietinum</i>    | 0.698 | 0.466 | 0.569 |
| <i>Elodea nuttallii</i>       | 0.839 | 0.617 | 0.533 |
| <i>Ephestia kuehniella</i>    | 0.893 | 0.505 | 1.146 |
| <i>Equus caballus</i>         | 0.787 | 0.692 | 0.659 |
| <i>Euphorbia esula</i>        | 0.822 | 0.682 | 0.713 |
| <i>Fallopia baldschuanica</i> | 0.841 | 0.668 | 0.766 |
| <i>Felis catus</i>            | 0.733 | 0.587 | 0.532 |

|                                   |       |       |       |
|-----------------------------------|-------|-------|-------|
| <i>Frankliniella occidentalis</i> | 0.724 | 0.53  | 0.693 |
| <i>Haematobia irritans</i>        | 0.855 | 0.581 | 0.661 |
| <i>Hakea sericea</i>              | 0.985 | 0.833 | 0.855 |
| <i>Heliotropium europaeum</i>     | 0.9   | 0.665 | 0.865 |
| <i>Hemitragus jemlahicus</i>      | 0.707 | 0.633 | 0.699 |
| <i>Heracleum mantegazzianum</i>   | 0.835 | 0.621 | 0.678 |
| <i>Herpestes edwardsi</i>         | 0.9   | 0.732 | 0.790 |
| <i>Herpestes javanicus</i>        | 0.945 | 0.654 | 0.741 |
| <i>Homarus americanus</i>         | 0.98  | 0.868 | 0.758 |
| <i>Hyblaea puera</i>              | 0.794 | 0.578 | 0.740 |
| <i>Hydrocotyle ranunculoides</i>  | 0.894 | 0.514 | 0.758 |
| <i>Hypera postica</i>             | 0.88  | 0.557 | 0.836 |
| <i>Impatiens glandulifera</i>     | 0.795 | 0.504 | 0.622 |
| <i>Lagarosiphon major</i>         | 0.898 | 0.576 | 0.760 |

|                                  |       |       |       |
|----------------------------------|-------|-------|-------|
| <i>Lantana camara</i>            | 0.949 | 0.787 | 0.824 |
| <i>Leptinotarsa decemlineata</i> | 0.88  | 0.58  | 0.855 |
| <i>Linepithema humile</i>        | 0.915 | 0.52  | 0.838 |
| <i>Lissachatina fulica</i>       | 0.977 | 0.817 | 0.825 |
| <i>Lithobates catesbeianus</i>   | 0.857 | 0.611 | 0.691 |
| <i>Lonicera japonica</i>         | 0.881 | 0.598 | 0.755 |
| <i>Ludwigia grandiflora</i>      | 0.917 | 0.456 | 0.762 |
| <i>Marrubium vulgare</i>         | 0.847 | 0.522 | 0.724 |
| <i>Melia azedarach</i>           | 0.921 | 0.703 | 0.867 |
| <i>Mimosa diplotricha</i>        | 0.922 | 0.583 | 0.789 |
| <i>Mimosa pigra</i>              | 0.974 | 0.683 | 0.759 |
| <i>Muntingia calabura</i>        | 0.981 | 0.885 | 0.866 |
| <i>Mus musculus</i>              | 0.841 | 0.699 | 0.705 |
| <i>Mustela erminea</i>           | 0.914 | 0.697 | 0.821 |

|                                 |       |       |       |
|---------------------------------|-------|-------|-------|
| <i>Mustela vison</i>            | 0.964 | 0.858 | 0.833 |
| <i>Myiopsitta monachus</i>      | 0.866 | 0.546 | 0.776 |
| <i>Myocastor coypus</i>         | 0.902 | 0.692 | 0.891 |
| <i>Myriophyllum aquaticum</i>   | 0.881 | 0.604 | 0.834 |
| <i>Nassella neesiana</i>        | 0.967 | 0.649 | 0.916 |
| <i>Nassella trichotoma</i>      | 0.975 | 0.823 | 0.855 |
| <i>Nyctereutes procyonoides</i> | 0.955 | 0.698 | 0.863 |
| <i>Nymphoides peltata</i>       | 0.82  | 0.655 | 0.682 |
| <i>Ondatra zibethicus</i>       | 0.89  | 0.624 | 0.717 |
| <i>Opuntia aurantiaca</i>       | 0.982 | 0.819 | 0.913 |
| <i>Oryctolagus cuniculus</i>    | 0.888 | 0.652 | 0.789 |
| <i>Oxyura jamaicensis</i>       | 0.778 | 0.645 | 0.637 |
| <i>Pacifastacus leniusculus</i> | 0.907 | 0.873 | 0.816 |
| <i>Paguma larvata</i>           | 0.841 | 0.634 | 0.789 |

|                                 |       |       |       |
|---------------------------------|-------|-------|-------|
| <i>Panicum repens</i>           | 0.969 | 0.691 | 0.870 |
| <i>Parkinsonia aculeata</i>     | 0.957 | 0.777 | 0.895 |
| <i>Parthenium hysterophorus</i> | 0.97  | 0.841 | 0.765 |
| <i>Passer domesticus</i>        | 0.813 | 0.551 | 0.667 |
| <i>Petromyzon marinus</i>       | 0.96  | 0.727 | 0.825 |
| <i>Phascolarctos cinereus</i>   | 0.96  | 0.807 | 0.800 |
| <i>Phasianus colchicus</i>      | 0.906 | 0.683 | 0.733 |
| <i>Phelipanche aegyptiaca</i>   | 0.888 | 0.678 | 0.823 |
| <i>Phoxinus phoxinus</i>        | 0.94  | 0.786 | 0.765 |
| <i>Phragmites australis</i>     | 0.784 | 0.583 | 0.620 |
| <i>Phthorimaea absoluta</i>     | 0.929 | 0.682 | 0.779 |
| <i>Pistia stratiotes</i>        | 0.889 | 0.516 | 0.677 |
| <i>Pomacea canaliculata</i>     | 0.934 | 0.643 | 0.864 |
| <i>Pontederia crassipes</i>     | 0.854 | 0.653 | 0.787 |

|                                  |       |       |       |
|----------------------------------|-------|-------|-------|
| <i>Procambarus clarkii</i>       | 0.877 | 0.555 | 0.724 |
| <i>Procyon lotor</i>             | 0.755 | 0.674 | 0.634 |
| <i>Prunus serotina</i>           | 0.885 | 0.693 | 0.731 |
| <i>Pseudorasbora parva</i>       | 0.954 | 0.718 | 0.713 |
| <i>Psittacula krameri</i>        | 0.942 | 0.671 | 0.782 |
| <i>Pteridium aquilinum</i>       | 0.794 | 0.493 | 0.674 |
| <i>Rattus exulans</i>            | 0.651 | 0.555 | 0.554 |
| <i>Rattus norvegicus</i>         | 0.893 | 0.64  | 0.837 |
| <i>Rattus rattus</i>             | 0.864 | 0.57  | 0.736 |
| <i>Reynoutria japonica</i>       | 0.816 | 0.517 | 0.725 |
| <i>Rhinella marina</i>           | 0.938 | 0.742 | 0.708 |
| <i>Rhododendron ponticum</i>     | 0.939 | 0.757 | 0.792 |
| <i>Rhynchophorus ferrugineus</i> | 0.97  | 0.792 | 0.781 |
| <i>Rosa rugosa</i>               | 0.807 | 0.676 | 0.598 |

|                                 |       |       |       |
|---------------------------------|-------|-------|-------|
| <i>Rumex lunaria</i>            | 0.929 | 0.804 | 0.757 |
| <i>Salvinia molesta</i>         | 0.904 | 0.754 | 0.658 |
| <i>Sciurus carolinensis</i>     | 0.872 | 0.65  | 0.650 |
| <i>Senecio inaequidens</i>      | 0.829 | 0.667 | 0.713 |
| <i>Senecio jacobaea</i>         | 0.865 | 0.542 | 0.704 |
| <i>Senecio madagascariensis</i> | 0.98  | 0.848 | 0.866 |
| <i>Senna obtusifolia</i>        | 0.968 | 0.799 | 0.865 |
| <i>Sirex noctilio</i>           | 0.874 | 0.525 | 0.796 |
| <i>Solanum mauritianum</i>      | 0.981 | 0.856 | 0.782 |
| <i>Solenopsis invicta</i>       | 0.954 | 0.777 | 0.776 |
| <i>Spodoptera frugiperda</i>    | 0.827 | 0.582 | 0.753 |
| <i>Sporobolus pyramidalis</i>   | 0.889 | 0.668 | 0.801 |
| <i>Stomoxys calcitrans</i>      | 0.788 | 0.570 | 0.608 |
| <i>Sturnus vulgaris</i>         | 0.873 | 0.75  | 0.753 |

|                              |       |       |       |
|------------------------------|-------|-------|-------|
| <i>Sus scrofa</i>            | 0.807 | 0.751 | 0.691 |
| <i>Tamarix aphylla</i>       | 0.961 | 0.748 | 0.747 |
| <i>Tinca tinca</i>           | 0.924 | 0.771 | 0.550 |
| <i>Trachemys scripta</i>     | 0.853 | 0.578 | 0.636 |
| <i>Trichosurus vulpecula</i> | 0.952 | 0.749 | 0.796 |
| <i>Ulex europaeus</i>        | 0.911 | 0.696 | 0.706 |
| <i>Vulpes vulpes</i>         | 0.836 | 0.686 | 0.677 |
| <i>Xanthium chinense</i>     | 0.974 | 0.783 | 0.654 |
| <i>Xanthium strumarium</i>   | 0.843 | 0.64  | 0.635 |
| <i>Xenopus laevis</i>        | 0.952 | 0.709 | 0.718 |

## References

1. Kuhn, M. (2008). Building predictive models in R using the caret package. *Journal of statistical software*, 28, 1-26.
2. Kohavi, R. (1995, August). A study of cross-validation and bootstrap for accuracy estimation and model selection. In *Ijcai* (Vol. 14, No. 2, pp. 1137-1145).
3. Hijmans, R. J. (2012). Cross-validation of species distribution models: removing spatial sorting bias and calibration with a null model. *Ecology*, 93(3), 679-688.
4. Hao, T., Elith, J., Lahoz-Monfort, J. J., & Guillera-Arroita, G. (2020). Testing whether ensemble modelling is advantageous for maximising predictive performance of species distribution models. *Ecography*, 43(4), 549-558
5. Norberg, A., Abrego, N., Blanchet, F. G., Adler, F. R., Anderson, B. J., Anttila, J., ... & Ovaskainen, O. (2019). A comprehensive evaluation of predictive performance of 33 species distribution models at species and community levels. *Ecological monographs*, 89(3), e01370
6. Jiménez-Valverde, A. (2012). Insights into the area under the receiver operating characteristic curve (AUC) as a discrimination measure in species distribution modelling. *Global Ecology and Biogeography*, 21(4), 498-507.
7. Lobo, J. M., Jiménez-Valverde, A., & Real, R. (2008). AUC: a misleading measure of the performance of predictive distribution models. *Global ecology and Biogeography*, 17(2), 145-151.
8. Allouche, O., Tsoar, A., & Kadmon, R. (2006). Assessing the accuracy of species distribution models: prevalence, kappa and the true skill statistic (TSS). *Journal of applied ecology*, 43(6), 1223-1232.
9. Chamberlain, S., Ram, K., Barve, V., Mcglinn, D., & Chamberlain, M. S. (2017). Package 'rgbif'. Interface to the global biodiversity information facility API, 5(0.9).
10. Zizka, A., Silvestro, D., Andermann, T., Azevedo, J., Duarte Ritter, C., Edler, D., ... & Antonelli, A. (2019). CoordinateCleaner: Standardized cleaning of occurrence records from biological collection databases. *Methods in Ecology and Evolution*, 10(5), 744-751.
11. Zizka, A., Carvalho, F. A., Calvente, A., Baez-Lizarazo, M. R., Cabral, A., Coelho, J. F. R., ... & Antonelli, A. (2020). No one-size-fits-all solution to clean GBIF. *PeerJ*, 8, e9916.
12. Leung, B., Hudgins, E. J., Potapova, A., & Ruiz-Jaen, M. C. (2019). A new baseline for countrywide  $\alpha$ -diversity and species distributions: illustration using > 6,000 plant species in Panama. *Ecological Applications*, 29(3), e01866

13. Amatulli, G., Domisch, S., Tuanmu, M. N., Parmentier, B., Ranipeta, A., Malczyk, J., & Jetz, W. (2018). A suite of global, cross-scale topographic variables for environmental and biodiversity modeling. *Scientific data*, 5(1), 1-15.
14. Karger, D. N., Wilson, A. M., Mahony, C., Zimmermann, N. E., & Jetz, W. (2021). Global daily 1 km land surface precipitation based on cloud cover-informed downscaling. *Scientific Data*, 8(1), 307.
15. CIESIN, I. (2013). Global roads open access data set, version 1 (gROADSv1). NASA Socioeconomic Data and Applications Center (SEDAC), Palisades, NY <https://doi.org/10.7927/H4VD6WCT>
16. Fick, S. E., & Hijmans, R. J. (2017). WorldClim 2: new 1-km spatial resolution climate surfaces for global land areas. *International journal of climatology*, 37(12), 4302-4315.
17. Zurell, D., Franklin, J., König, C., Bouchet, P. J., Dormann, C. F., Elith, J., ... & Merow, C. (2020). A standard protocol for reporting species distribution models. *Ecography*, 43(9), 1261-1277.
