# Supplementary material for: Using species ranges and macroeconomic data to fill the gap in costs of biological invasions
Source: Springer Nature journal article supplement (doi:10.1038/s41559-025-02697-5), 2025-05-26
Supplement: MOESM4 [file 41559_2025_2697_MOESM4_ESM.xlsx]

## Sheet: Sheet1
Country	InvaCost Damage	InvaCost Management	Total costs Damage	Total costs Management	Percentage Increase Damage	Percentage Increase Management
Afghanistan	0	0	125992	0.066215
Albania	0.0107695	0	2162067	0.053756	19975.8
Algeria	0	0	2498315	0.035373
Andorra	0	0	0.656244	0.016174
Angola	0	0	1651484	0.105895
Argentina	2554219447	0.027114	1018831	0.222275	2988814	7197817
Armenia	0	0	2092127	0.089214
Australia	2903663631	0.136815	1059697	0.902402	2649517	5595763
Austria	0.126201	8.64e-05	4776182	0.271156	3684594	313914
Azerbaijan	0	0	3105901	0.146107
Bahrain	0	0	0.077641	0.001214
Bangladesh	0	0	3718339	0.139857
Belarus	0.0018202	0	3961852	0.170066	217560
Belgium	0	0	5872875	0.468491
Belize	0.00081444	0.000145	0.418434	0.006253	51276.9	4219372
Benin	0.159114	0	0.921067	0.052094	478874
Bhutan	0.000310403	0	0.546687	0.027262	176022
Bolivia	0.0435926	0.000402	4589075	0.088306	10427.2	21858.9
Bosnia and Herzegovina	0.132723	0	2400818	0.130824	1708894
Botswana	0	0	1854214	0.105453
Brazil	0.246218	0.876365	1173773	1327274	4667209	5145211
Brunei	0.000669206	0	0.26858	0.019044	40034.1
Bulgaria	0.306856	0	5388511	0.212818	1656041
Burkina Faso	0	0	1570535	0.062091
Burundi**	0	0	3683633	0.146601
Cambodia	0.0256575	0.001233	1496254	0.060137	5731644	4776071
Cameroon	0.177856	0	1928987	0.047607	9845797
Canada	1311335578	0.045485	2827804	0.450084	115643	8895305
Cape Verde	0	0	1168777	0.036119
Central African Republic	0	0	0.22887	0.014208
Chad	0	0	0.558166	0.051182
Chile	0.064753	0.000106	4809076	0.17827	7326806	168172
China	1895464531	0.004539	4019411	2453955	2020541	53962.4
Colombia	3248623925	0.111014	954978	0.319784	1939638	1880574
Costa Rica	0	0	6375324	0.077545
Croatia	0.185509	0	2509441	0.148879	1252734
Cuba	0.161751	0.116335	6831744	0.31051	4123628	1669092
Cyprus	0	0	1604691	0.040129
Czech Republic	0.00621902	0.000136	5559667	0.366175	89297.8	269496
Democratic Republic of the Congo	0.0900993		0.774445		7595466
Denmark	0.000151684	0.000808	8825016	0.533761	5817910	65958.3
Djibouti	0	0	1039635	0.076886
Dominica**	0	0	1219547	0.068486
Dominican Republic	0	0	5527775	0.257171
East Timor	0.000381953	0	0.363883	0.04925	95169.1
Ecuador	0.0657471	0.001664	7317961	0.107766	11030.5	6376186
Egypt	0	0	2417963	0.077979
El Salvador	0	0	0.627396	0.059075
Equatorial Guinea	0	0	0.215448	0.022031
Estonia	0	0	1670271	0.093575
Ethiopia	0.409308	0	336551	0.111468	7222438
Federated States of Micronesia**	0	0	1786068	0.055673
Fiji	0	0	1674968	0.066378
Finland	0.000455051	0.00027	1815395	0.09743	398843	36040.1
France	0.376478	0.000862	2075628	1681734	5413274	194962
Gabon	0	0	0.577532	0.016989
Gambia	0	0	0.921527	0.067085
Georgia	0	0	2041051	0.139848
Germany	0.354684	0.054281	8559992	0.99438	2313416	1731914
Ghana	0.173073	0.004	1844255	0.160834	9655963	3920859
Greece	0.0269997	0	465804	0.295057	17152.2
Greenland	0	0	0.395783	0.001678
Guatemala	0.0380169	0.003378	1393457	0.087287	3565364	2483994
Guinea	0	0	0.789487	0.058992
Guinea Bissau	0	0	0.42432	0.024295
Guyana	0	0	0.607927	0.036985
Haiti	0	0	3454529	0.120319
Honduras	0	0	0.716795	0.052145
Hungary	0.917685	0	6088569	0.291816	5634705
Iceland	0	0.000547	0.823345	0.01067		1850842
India	1171544319	1.1e-07	2932152	128411	2402809	1160000000
Indonesia	0.345038	0.000515	9315337	0.256482	2599803	49712.7
Iran	0	0	2737402	0.091988
Iraq	0	0	1798911	0.068617
Ireland	0	0	8888538	0.634699
Israel	0	0	2434916	0.126189
Italy	0.343273	0.003089	107969	0.85305	3045283	27513.1
Ivory Coast		9.67e-08		9.67e-08		0
Jamaica	0	0	4338609	0.086724
Japan	0.12213	0.002827	9242832	0.781713	7468.03	27553.7
Jordan	0	0	0.226375	0.017753
Kazakhstan	0	0	294135	0.122289
Kenya	0.113956	0	5064485	0.167839	4344265
Kiribati**	0	0	1965484	0.035709
Kuwait	0	0	0.216382	0.004234
Kyrgyzstan	0	0	1859436	0.059809
Laos	0.0053589	0	0.316349	0.045418	5803244
Latvia	0	0	3253678	0.118356
Lebanon	0	0	1015191	0.051596
Lesotho**	0	0	2265494	0.133319
Liberia	0	0	0.414836	0.021243
Libya	0	0	0.220911	0.026794
Liechtenstein	0	0	1231516	0.071129
Lithuania	0	1.84e-05	3485277	0.152807		830406
Luxembourg	0	0	3586891	0.23123
Macedonia	0.00424714	0	1990491	0.097327	46766.7
Madagascar	0	0	8016627	0.27642
Malawi	0.254972	0	3677494	0.107702	1342312
Malaysia	0.343767	0.106355	2514848	0.174471	6315557	640469
Mali	0.011421	0	0.672764	0.040351	5790575
Malta	0	0.000149	178915	0.111284		74718.6
Mauritania	0	0	0.469342	0.021696
Mauritius	0	0	4491518	0.131961
Mexico	0.050251	0.291642	1128299	0.661464	22353.2	1268069
Moldova	0.233441	0	4221232	0.109683	1708267
Mongolia	0	0	1888925	0.059257
Montenegro	0.00197189	0	0.432951	0.04755	21856.2
Morocco	0	0	4762266	0.148122
Mozambique	0.14125	0	3794239	0.105686	2586189
Myanmar	0.0152318	0	128161	0.072538	8314052
Namibia	0	0	2721611	0.110193
Nepal	0	0	2256334	0.046723
Netherlands	8.00952	0.078845	9298225	0.761167	11608867	8653972
New Zealand	0.487204	0.202372	1025814	0.581757	2005512	1874692
Nicaragua	0	0.000804	2091817	0.060027		7363435
Niger	0.037094	0	1227064	0.032154	3207988
Nigeria	134055581	0	5530509	0.259236	3125534
Norway	0.0966544	0.001102	2239243	0.127592	2216753	11479.7
Oman	0	0	0.286348	0.014876
Pakistan	0.0563637	0	3501083	0.079135	6111.59
Panama	0	0.002081	1514881	0.03563		1611754
Papua New Guinea	0	0	1516075	0.022742
Paraguay	0.00252288	0.000298	0.99744	0.035386	39435.8	11791
Peru	0.136741	0.003009	392362	0.101581	2769376	3275803
Philippines	0.294979	0.157305	5206777	0.319993	1665137	1034216
Poland	0.0247244	0	8147951	0.389099	32855.1
Portugal	0.00302987	0	6856299	0.395626	226190
Qatar	0	0	0.111336	0.001269
Republic of Serbia	0.582616	0	3678652	0.13684	5314023
Republic of the Congo	0	0	1361806	0.066849
Romania	1165383958	0	7139245	0.334077	5126088
Russia	0.399838	0	7953291	0.358443	1889131
Rwanda	0.0200112	0	2329993	0.152944	11543.4
Saint Kitts and Nevis**	0	4.51e-05	0.970406	0.043179		95539.1
San Marino	0	0	0.543125	0.010794
Saudi Arabia	0	0	307143	0.19286
Senegal	0.012202	1.42e-06	154917	0.093074	12596.1	6533917
Sierra Leone	0	0	0.635079	0.052519
Singapore	0.12854	0.054486	0.645678	0.08825	4023166	6196805
Slovakia	0.150622	0	3578649	0.172479	2275919
Slovenia	0.027303	0	2920478	0.158065	10596.5
Somalia	0	0	0.845668	0.082877
South Africa	2144310778	0.286519	2017104	0.930478	840677	2247523
South Korea	0	0	1492245	0.029527
Spain	0.0144099	0.003531	113047	0.766394	78350.8	21602.5
Sri Lanka	4.43996	0.000104	506466	0.198203	11406904	190717
Sudan	0	0	2041422	0.072117
Suriname	0.00146197	0	0.173993	0.002895	11801.3
Swaziland	0	0	2205426	0.161006
Sweden	0.0590497	0.025508	2954213	0.311299	4902924	1120389
Switzerland	0.00743249	0	5009276	0.356186	67297
Syria	0	0	1349231	0.081605
Tajikistan	0	0	0.585542	0.028147
Thailand	0.616748	0.15432	4091077	0.324339	5633304	1101732
Togo	0	0	1127235	0.086204
Trinidad and Tobago	0	0	0.509295	0.055853
Tunisia	0	0	4101131	0.112611
Turkey	0.0981392	0	7851439	0.256733	7900309
Uganda	0.19581	0	5563274	0.255367	2741164
Ukraine	1510312127	0	116802	0.403776	6733631
United Arab Emirates	0	0	1781005	0.031075
United Kingdom	2499654336	0.727005	1307198	28869	79138.5	7542357
United Republic of Tanzania	0.88828	0	4939119	0.138934	7294988
United States of America	7385725143	5581598	1361126	1167311	8429149	1091356
Uruguay	0.0014868	1.61e-05	8782807	0.188329	590620	1170609
Uzbekistan	0	0	2058713	0.050219
Venezuela	0	2.19e-06	3512219	0.199782		9137983
Vietnam	0.0970028	0.007584	4133257	0.129242	4160967	1604051
Yemen	0	0	1673587	0.059882
Zambia	0.163994	0	1835791	0.062206	1019424
Zimbabwe	0.081021	0	2273105	0.103571	2705576
