# Supplementary material for: Using species ranges and macroeconomic data to fill the gap in costs of biological invasions
Source: Springer Nature journal article supplement (doi:10.1038/s41559-025-02697-5), 2025-05-26
Supplement: MOESM5 [file 41559_2025_2697_MOESM5_ESM.xlsx]

## Sheet: a,b
Order	Type_of_cost_merged	type	total_cost
Plants	Damage	Interpolated	905.583
Mammalia	Damage	Interpolated	834.802
Arthropods	Damage	Interpolated	811.953
Birds	Damage	Interpolated	98.6488
Mammalia	Damage	Invacost	75.3465
Plants	Management	Interpolated	50.2615
Mammalia	Management	Interpolated	32.0542
Plants	Damage	Invacost	20.8013
Arthropods	Damage	Invacost	18.34
Mollusks	Damage	Interpolated	16.1364
Arthropods	Management	Interpolated	6.45629
Fish	Damage	Interpolated	3.12354
Arthropods	Management	Invacost	2.96498
Birds	Management	Invacost	2.95427
Birds	Damage	Invacost	2.71615
Mammalia	Management	Invacost	2.07946
Plants	Management	Invacost	1.04461
Birds	Management	Interpolated	0.97396
Reptilia	Management	Interpolated	0.480939
Mollusks	Management	Interpolated	0.480019
Amphibia	Management	Interpolated	0.470115
Fish	Management	Interpolated	0.439451
Fish	Damage	Invacost	0.349793
Mollusks	Damage	Invacost	0.182159
Fish	Management	Invacost	0.0216653
Mollusks	Management	Invacost	0.00788681
Reptilia	Management	Invacost	0.00224713
Amphibia	Management	Invacost	0.00160433

## Sheet: c,d
Order	Species	Type_of_cost_merged	cost	Average_Cost	Type
Amphibians	Lithobates catesbeianus	Management	0.195182	0.15724	Damage
Amphibians	Rhinella marina	Management	0.164873	0.15724	Damage
Amphibians	Xenopus laevis	Management	0.111663	0.15724	Damage
Arthropods	Adelges piceae	Damage	7.11848	37.7406	Damage
Arthropods	Adelges tsugae	Management	0.0236952	0.362357	Damage
Arthropods	Aedes aegypti	Damage	7.28687	37.7406	Damage
Arthropods	Aedes aegypti	Management	4.42518	0.362357	Damage
Arthropods	Aedes albopictus	Management	0.100155	0.362357	Damage
Arthropods	Aedes camptorhynchus	Management	0.00363688	0.362357	Damage
Arthropods	Agrilus planipennis	Management	0.43254	0.362357	Damage
Arthropods	Anoplophora chinensis	Management	0.0387974	0.362357	Damage
Arthropods	Anoplophora glabripennis	Damage	10.2043	37.7406	Damage
Arthropods	Anoplophora glabripennis	Management	0.410232	0.362357	Damage
Arthropods	Apis mellifera	Damage	4.14585	37.7406	Damage
Arthropods	Bactrocera tryoni	Damage	0.411063	37.7406	Damage
Arthropods	Bactrocera tryoni	Management	0.0242452	0.362357	Damage
Arthropods	Bemisia tabaci	Management	0.268719	0.362357	Damage
Arthropods	Cactoblastis cactorum	Damage	2.65836	37.7406	Damage
Arthropods	Cactoblastis cactorum	Management	0.113354	0.362357	Damage
Arthropods	Cameraria ohridella	Management	0.390409	0.362357	Damage
Arthropods	Ceratitis capitata	Damage	10.1848	37.7406	Damage
Arthropods	Ceratitis capitata	Management	0.634972	0.362357	Damage
Arthropods	Ceutorhynchus obstrictus	Damage	22.5705	37.7406	Damage
Arthropods	Coptotermes formosanus	Damage	5.52959	37.7406	Damage
Arthropods	Cryptotermes brevis	Management	0.864272	0.362357	Damage
Arthropods	Cydia pomonella	Damage	2.03668	37.7406	Damage
Arthropods	Dendroctonus micans	Damage	0.311262	37.7406	Damage
Arthropods	Dendroctonus micans	Management	0.00722574	0.362357	Damage
Arthropods	Drosophila suzukii	Damage	3.52957	37.7406	Damage
Arthropods	Elatobium abietinum	Damage	1.71993	37.7406	Damage
Arthropods	Ephestia kuehniella	Damage	3.99609	37.7406	Damage
Arthropods	Ephestia kuehniella	Management	0.192359	0.362357	Damage
Arthropods	Frankliniella occidentalis	Damage	46.3302	37.7406	Damage
Arthropods	Haematobia irritans	Damage	17.0802	37.7406	Damage
Arthropods	Homarus americanus	Management	0.0460515	0.362357	Damage
Arthropods	Hyblaea puera	Management	0.0490272	0.362357	Damage
Arthropods	Hypera postica	Management	0.2381	0.362357	Damage
Arthropods	Leptinotarsa decemlineata	Damage	5.63102	37.7406	Damage
Arthropods	Leptinotarsa decemlineata	Management	0.119784	0.362357	Damage
Arthropods	Linepithema humile	Management	0.177298	0.362357	Damage
Arthropods	Pacifastacus leniusculus	Damage	4.68282	37.7406	Damage
Arthropods	Pacifastacus leniusculus	Management	0.125909	0.362357	Damage
Arthropods	Procambarus clarkii	Damage	7.38572	37.7406	Damage
Arthropods	Procambarus clarkii	Management	0.246041	0.362357	Damage
Arthropods	Rhynchophorus ferrugineus	Management	0.182969	0.362357	Damage
Arthropods	Sirex noctilio	Management	0.105403	0.362357	Damage
Arthropods	Solenopsis invicta	Management	0.144818	0.362357	Damage
Arthropods	Spodoptera frugiperda	Damage	4.80046	37.7406	Damage
Arthropods	Spodoptera frugiperda	Management	0.0560772	0.362357	Damage
Arthropods	Stomoxys calcitrans	Damage	11.9706	37.7406	Damage
Arthropods	Tuta absoluta	Damage	650.709	37.7406	Damage
Birds	Alopochen aegyptiaca	Damage	5.5598	12.6706	Damage
Birds	Branta canadensis	Damage	7.95228	12.6706	Damage
Birds	Branta canadensis	Management	0.279148	0.654705	Damage
Birds	Columba livia	Damage	39.6581	12.6706	Damage
Birds	Columba livia	Management	2.94647	0.654705	Damage
Birds	Cygnus olor	Damage	7.17554	12.6706	Damage
Birds	Cygnus olor	Management	0.212571	0.654705	Damage
Birds	Myiopsitta monachus	Management	0.0380384	0.654705	Damage
Birds	Oxyura jamaicensis	Management	0.137568	0.654705	Damage
Birds	Passer domesticus	Damage	13.3219	12.6706	Damage
Birds	Phasianus colchicus	Damage	11.3939	12.6706	Damage
Birds	Psittacula krameri	Damage	5.53934	12.6706	Damage
Birds	Psittacula krameri	Management	0.314437	0.654705	Damage
Birds	Sturnus vulgaris	Damage	10.7641	12.6706	Damage
Fish	Petromyzon marinus	Damage	3.47333	3.47333	Damage
Fish	Petromyzon marinus	Management	0.0330644	0.115279	Damage
Fish	Phoxinus phoxinus	Management	0.0296397	0.115279	Damage
Fish	Pseudorasbora parva	Management	0.210466	0.115279	Damage
Fish	Tinca tinca	Management	0.187946	0.115279	Damage
Mammals	Callosciurus erythraeus	Damage	1.87152	45.5074	Damage
Mammals	Camelus dromedarius	Damage	0.251245	45.5074	Damage
Mammals	Camelus dromedarius	Management	0.017441	1.62541	Damage
Mammals	Canis lupus	Damage	6.45581	45.5074	Damage
Mammals	Canis lupus	Management	1.82508	1.62541	Damage
Mammals	Capra hircus	Damage	10.0307	45.5074	Damage
Mammals	Capra hircus	Management	0.379812	1.62541	Damage
Mammals	Castor canadensis	Damage	4.79948	45.5074	Damage
Mammals	Chlorocebus pygerythrus	Management	0.104274	1.62541	Damage
Mammals	Equus caballus	Management	0.150866	1.62541	Damage
Mammals	Felis catus	Damage	48.905	45.5074	Damage
Mammals	Felis catus	Management	0.170111	1.62541	Damage
Mammals	Hemitragus jemlahicus	Management	0.0134448	1.62541	Damage
Mammals	Herpestes edwardsi	Damage	0.433559	45.5074	Damage
Mammals	Herpestes javanicus	Damage	5.17901	45.5074	Damage
Mammals	Muntiacus reevesi	Damage	1.13352	45.5074	Damage
Mammals	Mus musculus	Damage	13.0452	45.5074	Damage
Mammals	Mustela erminea	Management	0.04474	1.62541	Damage
Mammals	Mustela vison	Damage	655.767	45.5074	Damage
Mammals	Mustela vison	Management	26.9353	1.62541	Damage
Mammals	Myocastor coypus	Damage	5.23726	45.5074	Damage
Mammals	Myocastor coypus	Management	0.289405	1.62541	Damage
Mammals	Nyctereutes procyonoides	Management	0.227354	1.62541	Damage
Mammals	Ondatra zibethicus	Damage	11.7721	45.5074	Damage
Mammals	Ondatra zibethicus	Management	0.914985	1.62541	Damage
Mammals	Oryctolagus cuniculus	Damage	56.7645	45.5074	Damage
Mammals	Oryctolagus cuniculus	Management	0.637364	1.62541	Damage
Mammals	Paguma larvata	Damage	0.0566521	45.5074	Damage
Mammals	Phascolarctos cinereus	Management	0.000381987	1.62541	Damage
Mammals	Procyon lotor	Damage	7.66378	45.5074	Damage
Mammals	Procyon lotor	Management	0.189307	1.62541	Damage
Mammals	Rattus exulans	Management	0.129914	1.62541	Damage
Mammals	Rattus norvegicus	Management	0.97803	1.62541	Damage
Mammals	Rattus rattus	Damage	36.4421	45.5074	Damage
Mammals	Sciurus carolinensis	Damage	2.95387	45.5074	Damage
Mammals	Sciurus carolinensis	Management	0.163271	1.62541	Damage
Mammals	Sus scrofa	Damage	34.8315	45.5074	Damage
Mammals	Sus scrofa	Management	0.257305	1.62541	Damage
Mammals	Trichosurus vulpecula	Management	0.54776	1.62541	Damage
Mammals	Vulpes vulpes	Damage	6.55446	45.5074	Damage
Mammals	Vulpes vulpes	Management	0.157545	1.62541	Damage
Mollusks	Arion lusitanicus	Damage	4.82476	5.43952	Damage
Mollusks	Corbicula fluminea	Damage	6.59223	5.43952	Damage
Mollusks	Dreissena polymorpha	Management	0.259683	0.243953	Damage
Mollusks	Lissachatina fulica	Management	0.228223	0.243953	Damage
Mollusks	Pomacea canaliculata	Damage	4.90158	5.43952	Damage
Plants	Acacia mearnsii	Damage	29.9737	42.1084	Damage
Plants	Ageratina adenophora	Management	0.179123	0.814383	Damage
Plants	Ailanthus altissima	Management	0.317934	0.814383	Damage
Plants	Alternanthera philoxeroides	Management	0.0987923	0.814383	Damage
Plants	Ambrosia artemisiifolia	Damage	17.9953	42.1084	Damage
Plants	Ambrosia artemisiifolia	Management	0.332192	0.814383	Damage
Plants	Arctotheca calendula	Management	0.114375	0.814383	Damage
Plants	Artemisia vulgaris	Damage	5.1019	42.1084	Damage
Plants	Azolla filiculoides	Management	0.221492	0.814383	Damage
Plants	Buddleja davidii	Management	0.266439	0.814383	Damage
Plants	Cabomba caroliniana	Management	0.186676	0.814383	Damage
Plants	Carduus platypus	Damage	0.478446	42.1084	Damage
Plants	Carduus platypus	Management	0.00998658	0.814383	Damage
Plants	Cenchrus clandestinus	Damage	37.1495	42.1084	Damage
Plants	Cenchrus setaceus	Management	0.14939	0.814383	Damage
Plants	Cereus jamacaru	Management	0.206112	0.814383	Damage
Plants	Chondrilla juncea	Damage	4.73001	42.1084	Damage
Plants	Chondrilla juncea	Management	0.164624	0.814383	Damage
Plants	Chromolaena odorata	Management	1.04874	0.814383	Damage
Plants	Cirsium arvense	Damage	18.1751	42.1084	Damage
Plants	Clematis vitalba	Management	0.146836	0.814383	Damage
Plants	Coreopsis lanceolata	Management	0.180789	0.814383	Damage
Plants	Cortaderia selloana	Management	0.1787	0.814383	Damage
Plants	Crassula helmsii	Management	0.154403	0.814383	Damage
Plants	Cryptostegia grandiflora	Damage	7.1703	42.1084	Damage
Plants	Cryptostegia grandiflora	Management	0.217598	0.814383	Damage
Plants	Cytisus scoparius	Management	0.26046	0.814383	Damage
Plants	Echium plantagineum	Management	0.202468	0.814383	Damage
Plants	Elaeis guineensis	Damage	29.0344	42.1084	Damage
Plants	Elodea nuttallii	Management	0.322348	0.814383	Damage
Plants	Euphorbia esula	Damage	5.68968	42.1084	Damage
Plants	Fallopia baldschuanica	Management	0.149577	0.814383	Damage
Plants	Hakea sericea	Management	0.0454562	0.814383	Damage
Plants	Heliotropium europaeum	Management	0.122722	0.814383	Damage
Plants	Heracleum mantegazzianum	Damage	5.2982	42.1084	Damage
Plants	Heracleum mantegazzianum	Management	0.245616	0.814383	Damage
Plants	Hydrocotyle ranunculoides	Management	0.418488	0.814383	Damage
Plants	Impatiens glandulifera	Management	0.207096	0.814383	Damage
Plants	Lagarosiphon major	Management	0.167579	0.814383	Damage
Plants	Lantana camara	Damage	23.4206	42.1084	Damage
Plants	Lantana camara	Management	2.88973	0.814383	Damage
Plants	Lonicera japonica	Management	0.24981	0.814383	Damage
Plants	Ludwigia grandiflora	Management	0.0796569	0.814383	Damage
Plants	Marrubium vulgare	Damage	4.91999	42.1084	Damage
Plants	Marrubium vulgare	Management	0.144109	0.814383	Damage
Plants	Melia azedarach	Management	2.64759	0.814383	Damage
Plants	Mimosa diplotricha	Damage	3.5295	42.1084	Damage
Plants	Mimosa diplotricha	Management	0.124619	0.814383	Damage
Plants	Mimosa pigra	Management	0.407196	0.814383	Damage
Plants	Myriophyllum aquaticum	Management	0.334556	0.814383	Damage
Plants	Nassella neesiana	Management	0.124768	0.814383	Damage
Plants	Nassella trichotoma	Management	0.106066	0.814383	Damage
Plants	Nymphoides peltata	Management	0.483314	0.814383	Damage
Plants	Opuntia aurantiaca	Management	0.0700322	0.814383	Damage
Plants	Panicum repens	Management	0.179352	0.814383	Damage
Plants	Parkinsonia aculeata	Management	0.336128	0.814383	Damage
Plants	Parthenium hysterophorus	Damage	4.81565	42.1084	Damage
Plants	Parthenium hysterophorus	Management	0.449646	0.814383	Damage
Plants	Phelipanche aegyptiaca	Management	0.100865	0.814383	Damage
Plants	Phragmites australis	Management	0.0590271	0.814383	Damage
Plants	Pistia stratiotes	Management	0.368629	0.814383	Damage
Plants	Pontederia crassipes	Damage	688.22	42.1084	Damage
Plants	Pontederia crassipes	Management	26.9428	0.814383	Damage
Plants	Prunus serotina	Damage	6.90222	42.1084	Damage
Plants	Prunus serotina	Management	0.247513	0.814383	Damage
Plants	Pteridium aquilinum	Damage	9.54405	42.1084	Damage
Plants	Reynoutria japonica	Damage	6.98849	42.1084	Damage
Plants	Reynoutria japonica	Management	5.46513	0.814383	Damage
Plants	Rhododendron ponticum	Management	0.1521	0.814383	Damage
Plants	Rosa rugosa	Management	0.254726	0.814383	Damage
Plants	Rumex lunaria	Management	0.00816071	0.814383	Damage
Plants	Salvinia molesta	Damage	8.73902	42.1084	Damage
Plants	Salvinia molesta	Management	0.200155	0.814383	Damage
Plants	Senecio inaequidens	Management	0.137892	0.814383	Damage
Plants	Senecio jacobaea	Management	0.0608727	0.814383	Damage
Plants	Senecio madagascariensis	Management	0.084249	0.814383	Damage
Plants	Senna obtusifolia	Management	0.311155	0.814383	Damage
Plants	Solanum mauritianum	Management	0.239149	0.814383	Damage
Plants	Sporobolus pyramidalis	Management	0.0750108	0.814383	Damage
Plants	Tamarix aphylla	Management	0.113751	0.814383	Damage
Plants	Ulex europaeus	Damage	7.72254	42.1084	Damage
Plants	Ulex europaeus	Management	1.15603	0.814383	Damage
Plants	Xanthium chinense	Damage	0.785456	42.1084	Damage
Plants	Xanthium chinense	Management	0.0229453	0.814383	Damage
Plants	Xanthium strumarium	Management	0.36339	0.814383	Damage
Reptiles	Anolis carolinensis	Management	0.0854976	0.120796	Damage
Reptiles	Boiga irregularis	Management	0.00876939	0.120796	Damage
Reptiles	Chelydra serpentina	Management	0.123165	0.120796	Damage
Reptiles	Trachemys scripta	Management	0.265754	0.120796	Damage
Amphibians	Lithobates catesbeianus	Management	0.195182	0.15724	Management
Amphibians	Rhinella marina	Management	0.164873	0.15724	Management
Amphibians	Xenopus laevis	Management	0.111663	0.15724	Management
Arthropods	Adelges piceae	Damage	7.11848	37.7406	Management
Arthropods	Adelges tsugae	Management	0.0236952	0.362357	Management
Arthropods	Aedes aegypti	Damage	7.28687	37.7406	Management
Arthropods	Aedes aegypti	Management	4.42518	0.362357	Management
Arthropods	Aedes albopictus	Management	0.100155	0.362357	Management
Arthropods	Aedes camptorhynchus	Management	0.00363688	0.362357	Management
Arthropods	Agrilus planipennis	Management	0.43254	0.362357	Management
Arthropods	Anoplophora chinensis	Management	0.0387974	0.362357	Management
Arthropods	Anoplophora glabripennis	Damage	10.2043	37.7406	Management
Arthropods	Anoplophora glabripennis	Management	0.410232	0.362357	Management
Arthropods	Apis mellifera	Damage	4.14585	37.7406	Management
Arthropods	Bactrocera tryoni	Damage	0.411063	37.7406	Management
Arthropods	Bactrocera tryoni	Management	0.0242452	0.362357	Management
Arthropods	Bemisia tabaci	Management	0.268719	0.362357	Management
Arthropods	Cactoblastis cactorum	Damage	2.65836	37.7406	Management
Arthropods	Cactoblastis cactorum	Management	0.113354	0.362357	Management
Arthropods	Cameraria ohridella	Management	0.390409	0.362357	Management
Arthropods	Ceratitis capitata	Damage	10.1848	37.7406	Management
Arthropods	Ceratitis capitata	Management	0.634972	0.362357	Management
Arthropods	Ceutorhynchus obstrictus	Damage	22.5705	37.7406	Management
Arthropods	Coptotermes formosanus	Damage	5.52959	37.7406	Management
Arthropods	Cryptotermes brevis	Management	0.864272	0.362357	Management
Arthropods	Cydia pomonella	Damage	2.03668	37.7406	Management
Arthropods	Dendroctonus micans	Damage	0.311262	37.7406	Management
Arthropods	Dendroctonus micans	Management	0.00722574	0.362357	Management
Arthropods	Drosophila suzukii	Damage	3.52957	37.7406	Management
Arthropods	Elatobium abietinum	Damage	1.71993	37.7406	Management
Arthropods	Ephestia kuehniella	Damage	3.99609	37.7406	Management
Arthropods	Ephestia kuehniella	Management	0.192359	0.362357	Management
Arthropods	Frankliniella occidentalis	Damage	46.3302	37.7406	Management
Arthropods	Haematobia irritans	Damage	17.0802	37.7406	Management
Arthropods	Homarus americanus	Management	0.0460515	0.362357	Management
Arthropods	Hyblaea puera	Management	0.0490272	0.362357	Management
Arthropods	Hypera postica	Management	0.2381	0.362357	Management
Arthropods	Leptinotarsa decemlineata	Damage	5.63102	37.7406	Management
Arthropods	Leptinotarsa decemlineata	Management	0.119784	0.362357	Management
Arthropods	Linepithema humile	Management	0.177298	0.362357	Management
Arthropods	Pacifastacus leniusculus	Damage	4.68282	37.7406	Management
Arthropods	Pacifastacus leniusculus	Management	0.125909	0.362357	Management
Arthropods	Procambarus clarkii	Damage	7.38572	37.7406	Management
Arthropods	Procambarus clarkii	Management	0.246041	0.362357	Management
Arthropods	Rhynchophorus ferrugineus	Management	0.182969	0.362357	Management
Arthropods	Sirex noctilio	Management	0.105403	0.362357	Management
Arthropods	Solenopsis invicta	Management	0.144818	0.362357	Management
Arthropods	Spodoptera frugiperda	Damage	4.80046	37.7406	Management
Arthropods	Spodoptera frugiperda	Management	0.0560772	0.362357	Management
Arthropods	Stomoxys calcitrans	Damage	11.9706	37.7406	Management
Arthropods	Tuta absoluta	Damage	650.709	37.7406	Management
Birds	Alopochen aegyptiaca	Damage	5.5598	12.6706	Management
Birds	Branta canadensis	Damage	7.95228	12.6706	Management
Birds	Branta canadensis	Management	0.279148	0.654705	Management
Birds	Columba livia	Damage	39.6581	12.6706	Management
Birds	Columba livia	Management	2.94647	0.654705	Management
Birds	Cygnus olor	Damage	7.17554	12.6706	Management
Birds	Cygnus olor	Management	0.212571	0.654705	Management
Birds	Myiopsitta monachus	Management	0.0380384	0.654705	Management
Birds	Oxyura jamaicensis	Management	0.137568	0.654705	Management
Birds	Passer domesticus	Damage	13.3219	12.6706	Management
Birds	Phasianus colchicus	Damage	11.3939	12.6706	Management
Birds	Psittacula krameri	Damage	5.53934	12.6706	Management
Birds	Psittacula krameri	Management	0.314437	0.654705	Management
Birds	Sturnus vulgaris	Damage	10.7641	12.6706	Management
Fish	Petromyzon marinus	Damage	3.47333	3.47333	Management
Fish	Petromyzon marinus	Management	0.0330644	0.115279	Management
Fish	Phoxinus phoxinus	Management	0.0296397	0.115279	Management
Fish	Pseudorasbora parva	Management	0.210466	0.115279	Management
Fish	Tinca tinca	Management	0.187946	0.115279	Management
Mammals	Callosciurus erythraeus	Damage	1.87152	45.5074	Management
Mammals	Camelus dromedarius	Damage	0.251245	45.5074	Management
Mammals	Camelus dromedarius	Management	0.017441	1.62541	Management
Mammals	Canis lupus	Damage	6.45581	45.5074	Management
Mammals	Canis lupus	Management	1.82508	1.62541	Management
Mammals	Capra hircus	Damage	10.0307	45.5074	Management
Mammals	Capra hircus	Management	0.379812	1.62541	Management
Mammals	Castor canadensis	Damage	4.79948	45.5074	Management
Mammals	Chlorocebus pygerythrus	Management	0.104274	1.62541	Management
Mammals	Equus caballus	Management	0.150866	1.62541	Management
Mammals	Felis catus	Damage	48.905	45.5074	Management
Mammals	Felis catus	Management	0.170111	1.62541	Management
Mammals	Hemitragus jemlahicus	Management	0.0134448	1.62541	Management
Mammals	Herpestes edwardsi	Damage	0.433559	45.5074	Management
Mammals	Herpestes javanicus	Damage	5.17901	45.5074	Management
Mammals	Muntiacus reevesi	Damage	1.13352	45.5074	Management
Mammals	Mus musculus	Damage	13.0452	45.5074	Management
Mammals	Mustela erminea	Management	0.04474	1.62541	Management
Mammals	Mustela vison	Damage	655.767	45.5074	Management
Mammals	Mustela vison	Management	26.9353	1.62541	Management
Mammals	Myocastor coypus	Damage	5.23726	45.5074	Management
Mammals	Myocastor coypus	Management	0.289405	1.62541	Management
Mammals	Nyctereutes procyonoides	Management	0.227354	1.62541	Management
Mammals	Ondatra zibethicus	Damage	11.7721	45.5074	Management
Mammals	Ondatra zibethicus	Management	0.914985	1.62541	Management
Mammals	Oryctolagus cuniculus	Damage	56.7645	45.5074	Management
Mammals	Oryctolagus cuniculus	Management	0.637364	1.62541	Management
Mammals	Paguma larvata	Damage	0.0566521	45.5074	Management
Mammals	Phascolarctos cinereus	Management	0.000381987	1.62541	Management
Mammals	Procyon lotor	Damage	7.66378	45.5074	Management
Mammals	Procyon lotor	Management	0.189307	1.62541	Management
Mammals	Rattus exulans	Management	0.129914	1.62541	Management
Mammals	Rattus norvegicus	Management	0.97803	1.62541	Management
Mammals	Rattus rattus	Damage	36.4421	45.5074	Management
Mammals	Sciurus carolinensis	Damage	2.95387	45.5074	Management
Mammals	Sciurus carolinensis	Management	0.163271	1.62541	Management
Mammals	Sus scrofa	Damage	34.8315	45.5074	Management
Mammals	Sus scrofa	Management	0.257305	1.62541	Management
Mammals	Trichosurus vulpecula	Management	0.54776	1.62541	Management
Mammals	Vulpes vulpes	Damage	6.55446	45.5074	Management
Mammals	Vulpes vulpes	Management	0.157545	1.62541	Management
Mollusks	Arion lusitanicus	Damage	4.82476	5.43952	Management
Mollusks	Corbicula fluminea	Damage	6.59223	5.43952	Management
Mollusks	Dreissena polymorpha	Management	0.259683	0.243953	Management
Mollusks	Lissachatina fulica	Management	0.228223	0.243953	Management
Mollusks	Pomacea canaliculata	Damage	4.90158	5.43952	Management
Plants	Acacia mearnsii	Damage	29.9737	42.1084	Management
Plants	Ageratina adenophora	Management	0.179123	0.814383	Management
Plants	Ailanthus altissima	Management	0.317934	0.814383	Management
Plants	Alternanthera philoxeroides	Management	0.0987923	0.814383	Management
Plants	Ambrosia artemisiifolia	Damage	17.9953	42.1084	Management
Plants	Ambrosia artemisiifolia	Management	0.332192	0.814383	Management
Plants	Arctotheca calendula	Management	0.114375	0.814383	Management
Plants	Artemisia vulgaris	Damage	5.1019	42.1084	Management
Plants	Azolla filiculoides	Management	0.221492	0.814383	Management
Plants	Buddleja davidii	Management	0.266439	0.814383	Management
Plants	Cabomba caroliniana	Management	0.186676	0.814383	Management
Plants	Carduus platypus	Damage	0.478446	42.1084	Management
Plants	Carduus platypus	Management	0.00998658	0.814383	Management
Plants	Cenchrus clandestinus	Damage	37.1495	42.1084	Management
Plants	Cenchrus setaceus	Management	0.14939	0.814383	Management
Plants	Cereus jamacaru	Management	0.206112	0.814383	Management
Plants	Chondrilla juncea	Damage	4.73001	42.1084	Management
Plants	Chondrilla juncea	Management	0.164624	0.814383	Management
Plants	Chromolaena odorata	Management	1.04874	0.814383	Management
Plants	Cirsium arvense	Damage	18.1751	42.1084	Management
Plants	Clematis vitalba	Management	0.146836	0.814383	Management
Plants	Coreopsis lanceolata	Management	0.180789	0.814383	Management
Plants	Cortaderia selloana	Management	0.1787	0.814383	Management
Plants	Crassula helmsii	Management	0.154403	0.814383	Management
Plants	Cryptostegia grandiflora	Damage	7.1703	42.1084	Management
Plants	Cryptostegia grandiflora	Management	0.217598	0.814383	Management
Plants	Cytisus scoparius	Management	0.26046	0.814383	Management
Plants	Echium plantagineum	Management	0.202468	0.814383	Management
Plants	Elaeis guineensis	Damage	29.0344	42.1084	Management
Plants	Elodea nuttallii	Management	0.322348	0.814383	Management
Plants	Euphorbia esula	Damage	5.68968	42.1084	Management
Plants	Fallopia baldschuanica	Management	0.149577	0.814383	Management
Plants	Hakea sericea	Management	0.0454562	0.814383	Management
Plants	Heliotropium europaeum	Management	0.122722	0.814383	Management
Plants	Heracleum mantegazzianum	Damage	5.2982	42.1084	Management
Plants	Heracleum mantegazzianum	Management	0.245616	0.814383	Management
Plants	Hydrocotyle ranunculoides	Management	0.418488	0.814383	Management
Plants	Impatiens glandulifera	Management	0.207096	0.814383	Management
Plants	Lagarosiphon major	Management	0.167579	0.814383	Management
Plants	Lantana camara	Damage	23.4206	42.1084	Management
Plants	Lantana camara	Management	2.88973	0.814383	Management
Plants	Lonicera japonica	Management	0.24981	0.814383	Management
Plants	Ludwigia grandiflora	Management	0.0796569	0.814383	Management
Plants	Marrubium vulgare	Damage	4.91999	42.1084	Management
Plants	Marrubium vulgare	Management	0.144109	0.814383	Management
Plants	Melia azedarach	Management	2.64759	0.814383	Management
Plants	Mimosa diplotricha	Damage	3.5295	42.1084	Management
Plants	Mimosa diplotricha	Management	0.124619	0.814383	Management
Plants	Mimosa pigra	Management	0.407196	0.814383	Management
Plants	Myriophyllum aquaticum	Management	0.334556	0.814383	Management
Plants	Nassella neesiana	Management	0.124768	0.814383	Management
Plants	Nassella trichotoma	Management	0.106066	0.814383	Management
Plants	Nymphoides peltata	Management	0.483314	0.814383	Management
Plants	Opuntia aurantiaca	Management	0.0700322	0.814383	Management
Plants	Panicum repens	Management	0.179352	0.814383	Management
Plants	Parkinsonia aculeata	Management	0.336128	0.814383	Management
Plants	Parthenium hysterophorus	Damage	4.81565	42.1084	Management
Plants	Parthenium hysterophorus	Management	0.449646	0.814383	Management
Plants	Phelipanche aegyptiaca	Management	0.100865	0.814383	Management
Plants	Phragmites australis	Management	0.0590271	0.814383	Management
Plants	Pistia stratiotes	Management	0.368629	0.814383	Management
Plants	Pontederia crassipes	Damage	688.22	42.1084	Management
Plants	Pontederia crassipes	Management	26.9428	0.814383	Management
Plants	Prunus serotina	Damage	6.90222	42.1084	Management
Plants	Prunus serotina	Management	0.247513	0.814383	Management
Plants	Pteridium aquilinum	Damage	9.54405	42.1084	Management
Plants	Reynoutria japonica	Damage	6.98849	42.1084	Management
Plants	Reynoutria japonica	Management	5.46513	0.814383	Management
Plants	Rhododendron ponticum	Management	0.1521	0.814383	Management
Plants	Rosa rugosa	Management	0.254726	0.814383	Management
Plants	Rumex lunaria	Management	0.00816071	0.814383	Management
Plants	Salvinia molesta	Damage	8.73902	42.1084	Management
Plants	Salvinia molesta	Management	0.200155	0.814383	Management
Plants	Senecio inaequidens	Management	0.137892	0.814383	Management
Plants	Senecio jacobaea	Management	0.0608727	0.814383	Management
Plants	Senecio madagascariensis	Management	0.084249	0.814383	Management
Plants	Senna obtusifolia	Management	0.311155	0.814383	Management
Plants	Solanum mauritianum	Management	0.239149	0.814383	Management
Plants	Sporobolus pyramidalis	Management	0.0750108	0.814383	Management
Plants	Tamarix aphylla	Management	0.113751	0.814383	Management
Plants	Ulex europaeus	Damage	7.72254	42.1084	Management
Plants	Ulex europaeus	Management	1.15603	0.814383	Management
Plants	Xanthium chinense	Damage	0.785456	42.1084	Management
Plants	Xanthium chinense	Management	0.0229453	0.814383	Management
Plants	Xanthium strumarium	Management	0.36339	0.814383	Management
Reptiles	Anolis carolinensis	Management	0.0854976	0.120796	Management
Reptiles	Boiga irregularis	Management	0.00876939	0.120796	Management
Reptiles	Chelydra serpentina	Management	0.123165	0.120796	Management
Reptiles	Trachemys scripta	Management	0.265754	0.120796	Management
