# Supplementary material for: Using species ranges and macroeconomic data to fill the gap in costs of biological invasions
Source: Springer Nature journal article supplement (doi:10.1038/s41559-025-02697-5), 2025-05-26
Supplement: MOESM6 [file 41559_2025_2697_MOESM6_ESM.xlsx]

## Sheet: b
Species	Type_of_cost_merged	Cost	Cost_transformed
Aedes aegypti	Management	8.441e-06	8441
Branta canadensis	Damage	6.27006e-05	62700.6
Cactoblastis cactorum	Damage	5.28732e-05	52873.2
Lantana camara	Management	1.9109e-06	1910.9
Mus musculus	Damage	4.77992e-05	47799.2
Rattus norvegicus	Management	1.64064e-06	1640.64
Reynoutria japonica	Management	1.02499e-05	10249.9
Rumex lunaria	Management	1.82125e-06	1821.25
Sus scrofa	Damage	0.000121678	121678
Tuta absoluta	Damage	4.56756e-05	45675.6

## Sheet: c
Country	Cost	Cost_transformed
San Marino	0.000893403	893403
Saint Kitts and Nevis	0.000306523	306523
Liechtenstein	0.000242424	242424
Malta	0.000197046	197046
Andorra	0.000122009	122009
Micronesia, Federated States of	0.000117257	117257
Dominica	8.90331e-05	89033.1
Singapore	5.24809e-05	52480.9
Mauritius	4.69328e-05	46932.8
Bahrain	3.27042e-05	32704.2
United Kingdom	2.96722e-05	29672.2
Luxembourg	2.62049e-05	26204.9
Cabo Verde	1.80683e-05	18068.3
Jamaica	1.08144e-05	10814.4
Lebanon	9.84448e-06	9844.48
Gambia	9.12887e-06	9128.87
Burundi	7.72319e-06	7723.19
Trinidad and Tobago	7.07209e-06	7072.09
Eswatini	6.55051e-06	6550.51
Djibouti	6.43147e-06	6431.47
